# Supplementary material
Source: PubMed Central journal article supplement (PMC5510986)
Supplement: NIHMS878336-supplement-7.pdf [file NIHMS878336-supplement-7.pdf]

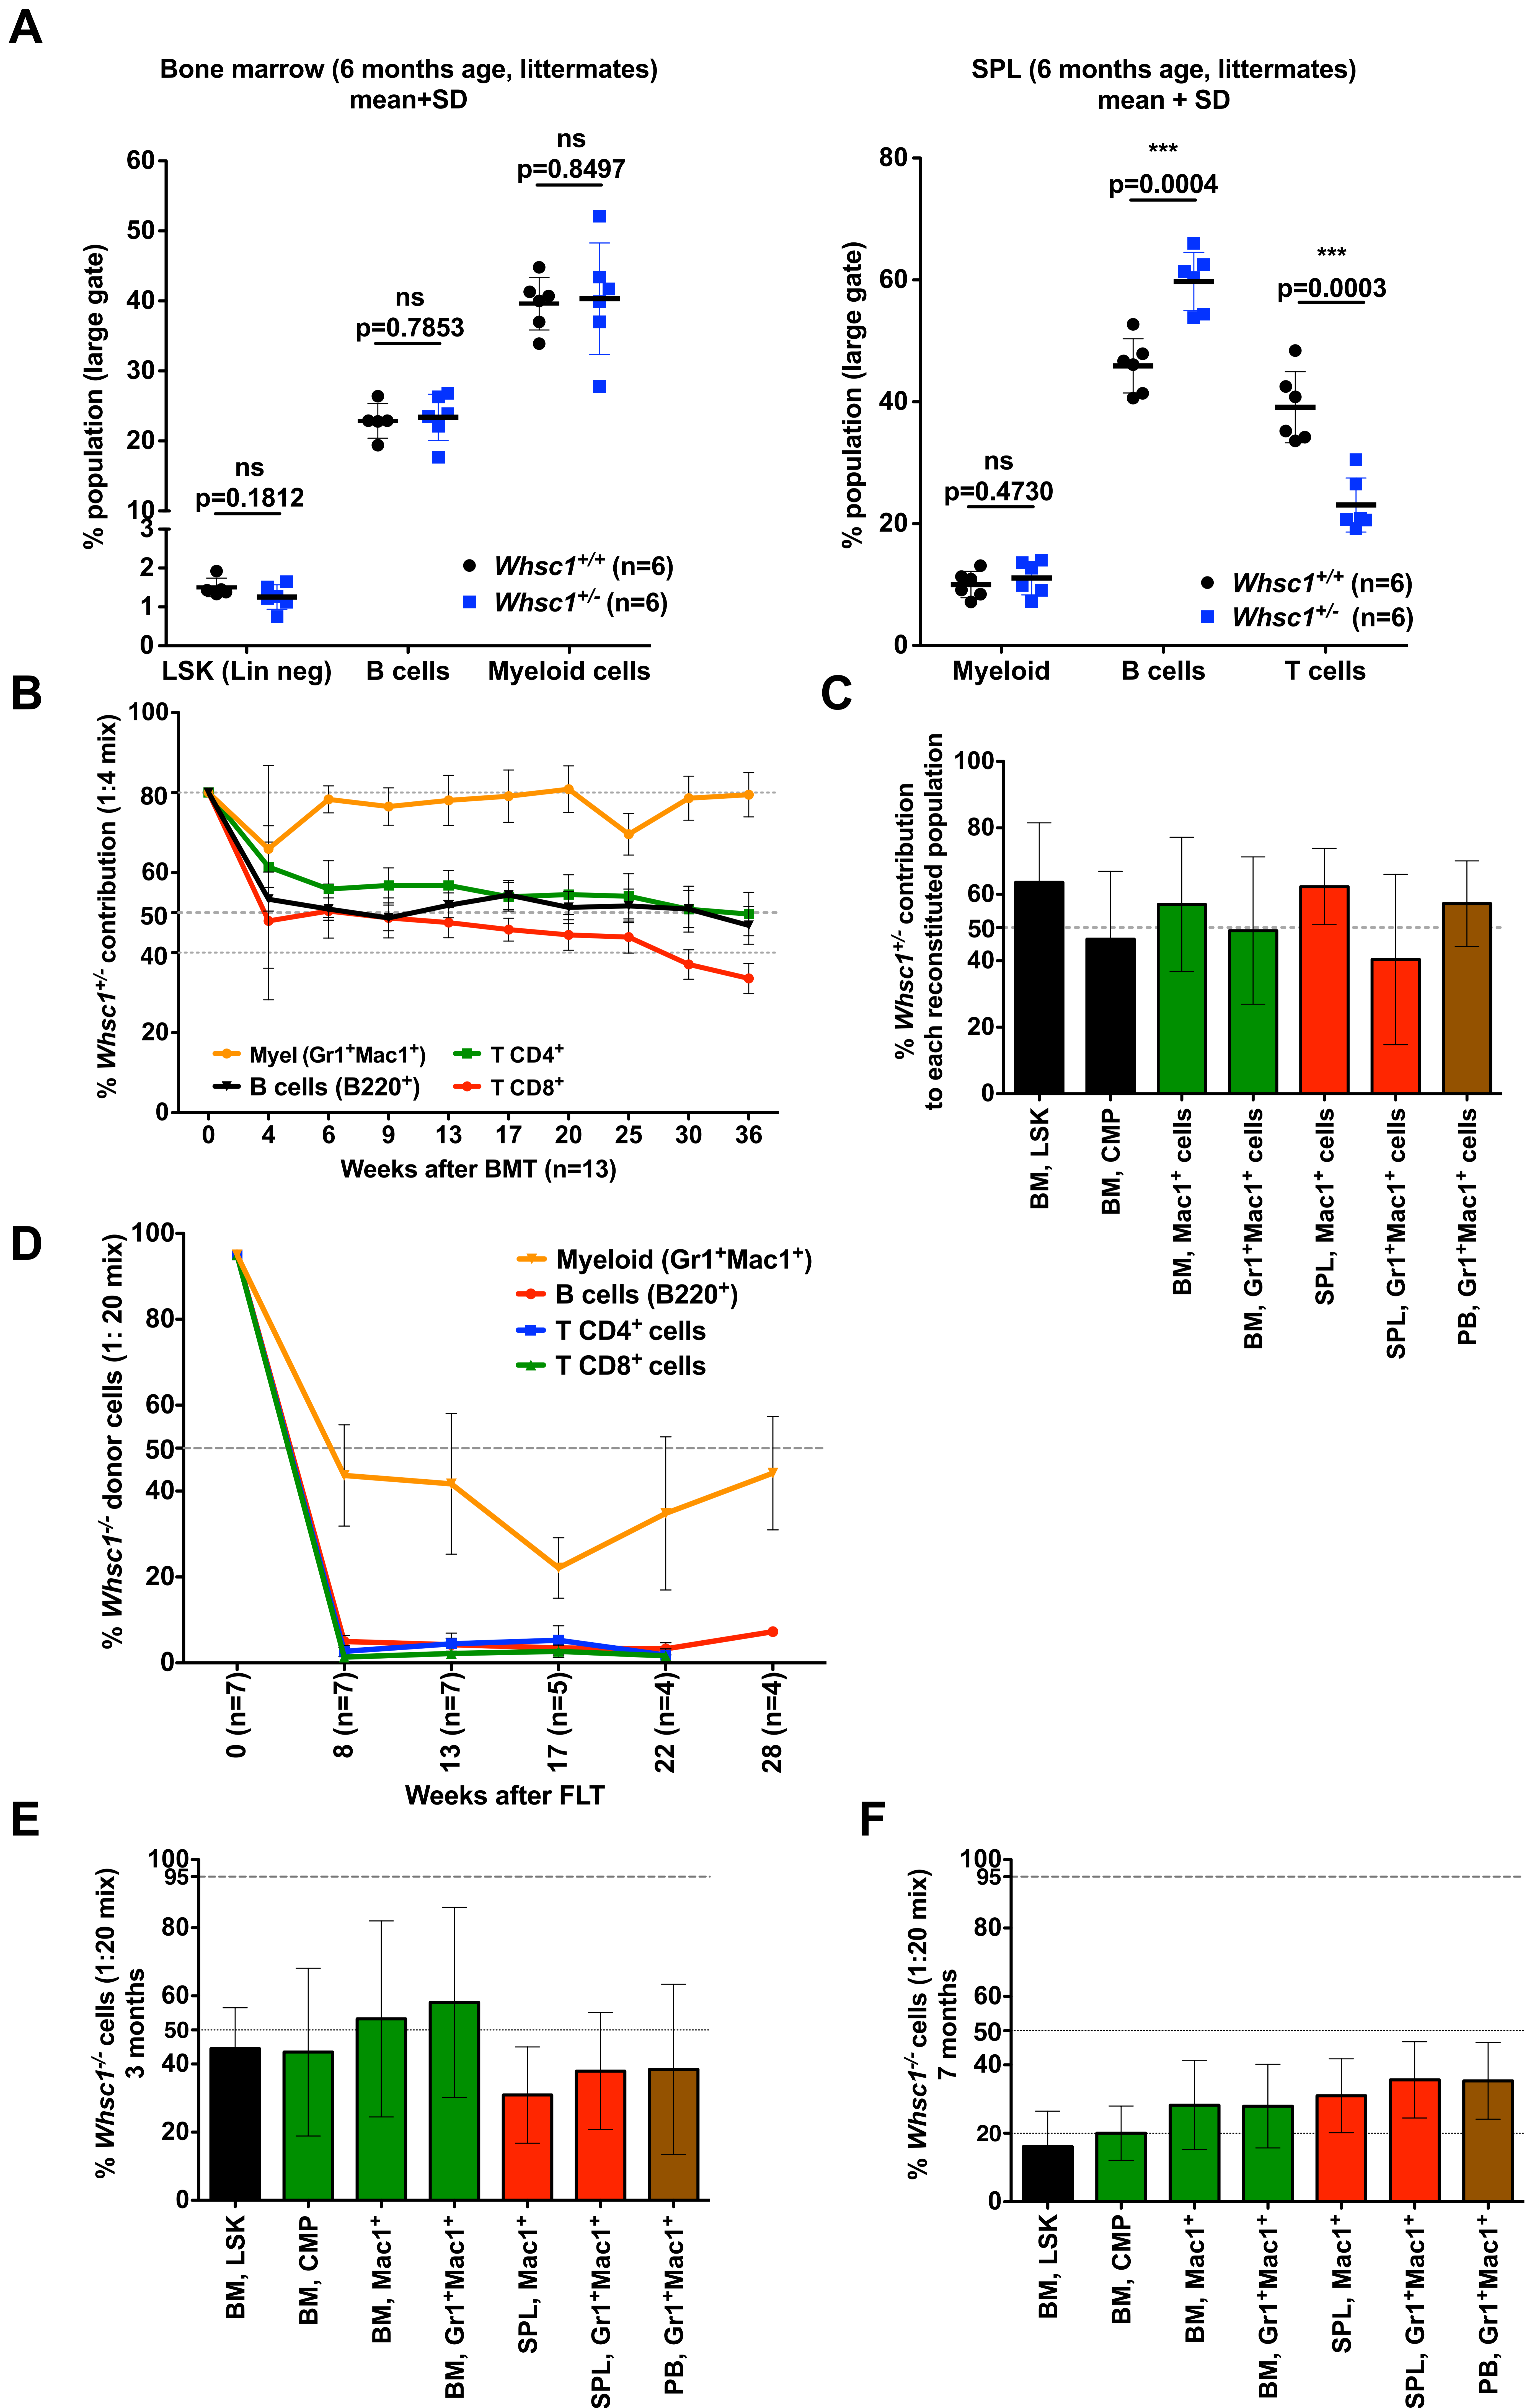

**Figure S1** (related to Figure 1) **(A)** Absence of major alterations in the hematopoietic development of young *Whsc1*<sup>+/-</sup> mice. The graphs represent the percentages, as determined by FACS, of the indicated cellular populations in the BM (left) and spleen (right) of either WT (black circles) or *Whsc1*<sup>+/-</sup> (blue squares) 6 month-old littermate mice. A total of 6 WT and 6 *Whsc1*<sup>+/-</sup> mice were analyzed. p values refer to a two-sided Student's t test. **(B)** Rescue of the disadvantage of *Whsc1*<sup>+/-</sup> hematopoietic cells in a competitive BM reconstitution assay. The vertical axis shows the percentage of contribution of the indicated *Whsc1*<sup>+/-</sup> cell types to the peripheral blood of recipient mice injected with a 1:4 mix of WT:*Whsc1*<sup>+/-</sup> cells, as determined by flow cytometry of peripheral blood samples at the times indicated on the "x" axis. *Whsc1*<sup>+/-</sup> myeloid cells behave similarly to WT cells and are maintained at the ratio of injection, while the 5-fold impairment of *Whsc1*<sup>+/-</sup> cells (see also **Figure 1B**) can be rescued by increasing the percentage of competing cells. Mean ± SEM are shown. **(C)** Percentage of contribution of the indicated *Whsc1*<sup>+/-</sup> myeloid cell types to the indicated hematopoietic organs of recipient mice injected with a 1:1 mix of WT:*Whsc1*<sup>+/-</sup> cells, 3-6 months after injection. n = 5 mice for each time point. Mean ± SD are shown. **(D)** Vertical axis shows the drastically reduced percentage of contribution of the indicated *Whsc1*<sup>+/-</sup> cell types to the peripheral blood of recipient mice injected with either a 1:20 mix of WT:*Whsc1*<sup>+/-</sup> cells, as determined by flow cytometry of peripheral blood samples at the weeks indicated on the "x" axis. Mean ± SEM are shown. **(E, F)** Percentage of contribution of the indicated *Whsc1*<sup>+/-</sup> cell types to the indicated hematopoietic organs of recipient mice injected with a 1:20 mix of WT:*Whsc1*<sup>+/-</sup> cells, 3 **(E)** or 7 **(F)** months after injection. The panels show how myeloid compartments are unaffected relative to the BM LSK percentages. n = 2 or 5 mice (3 and 7 months, respectively). Mean ± SD are shown.

A

Primary Transplant Recipients (8 weeks after FLT)

White Blood Cells

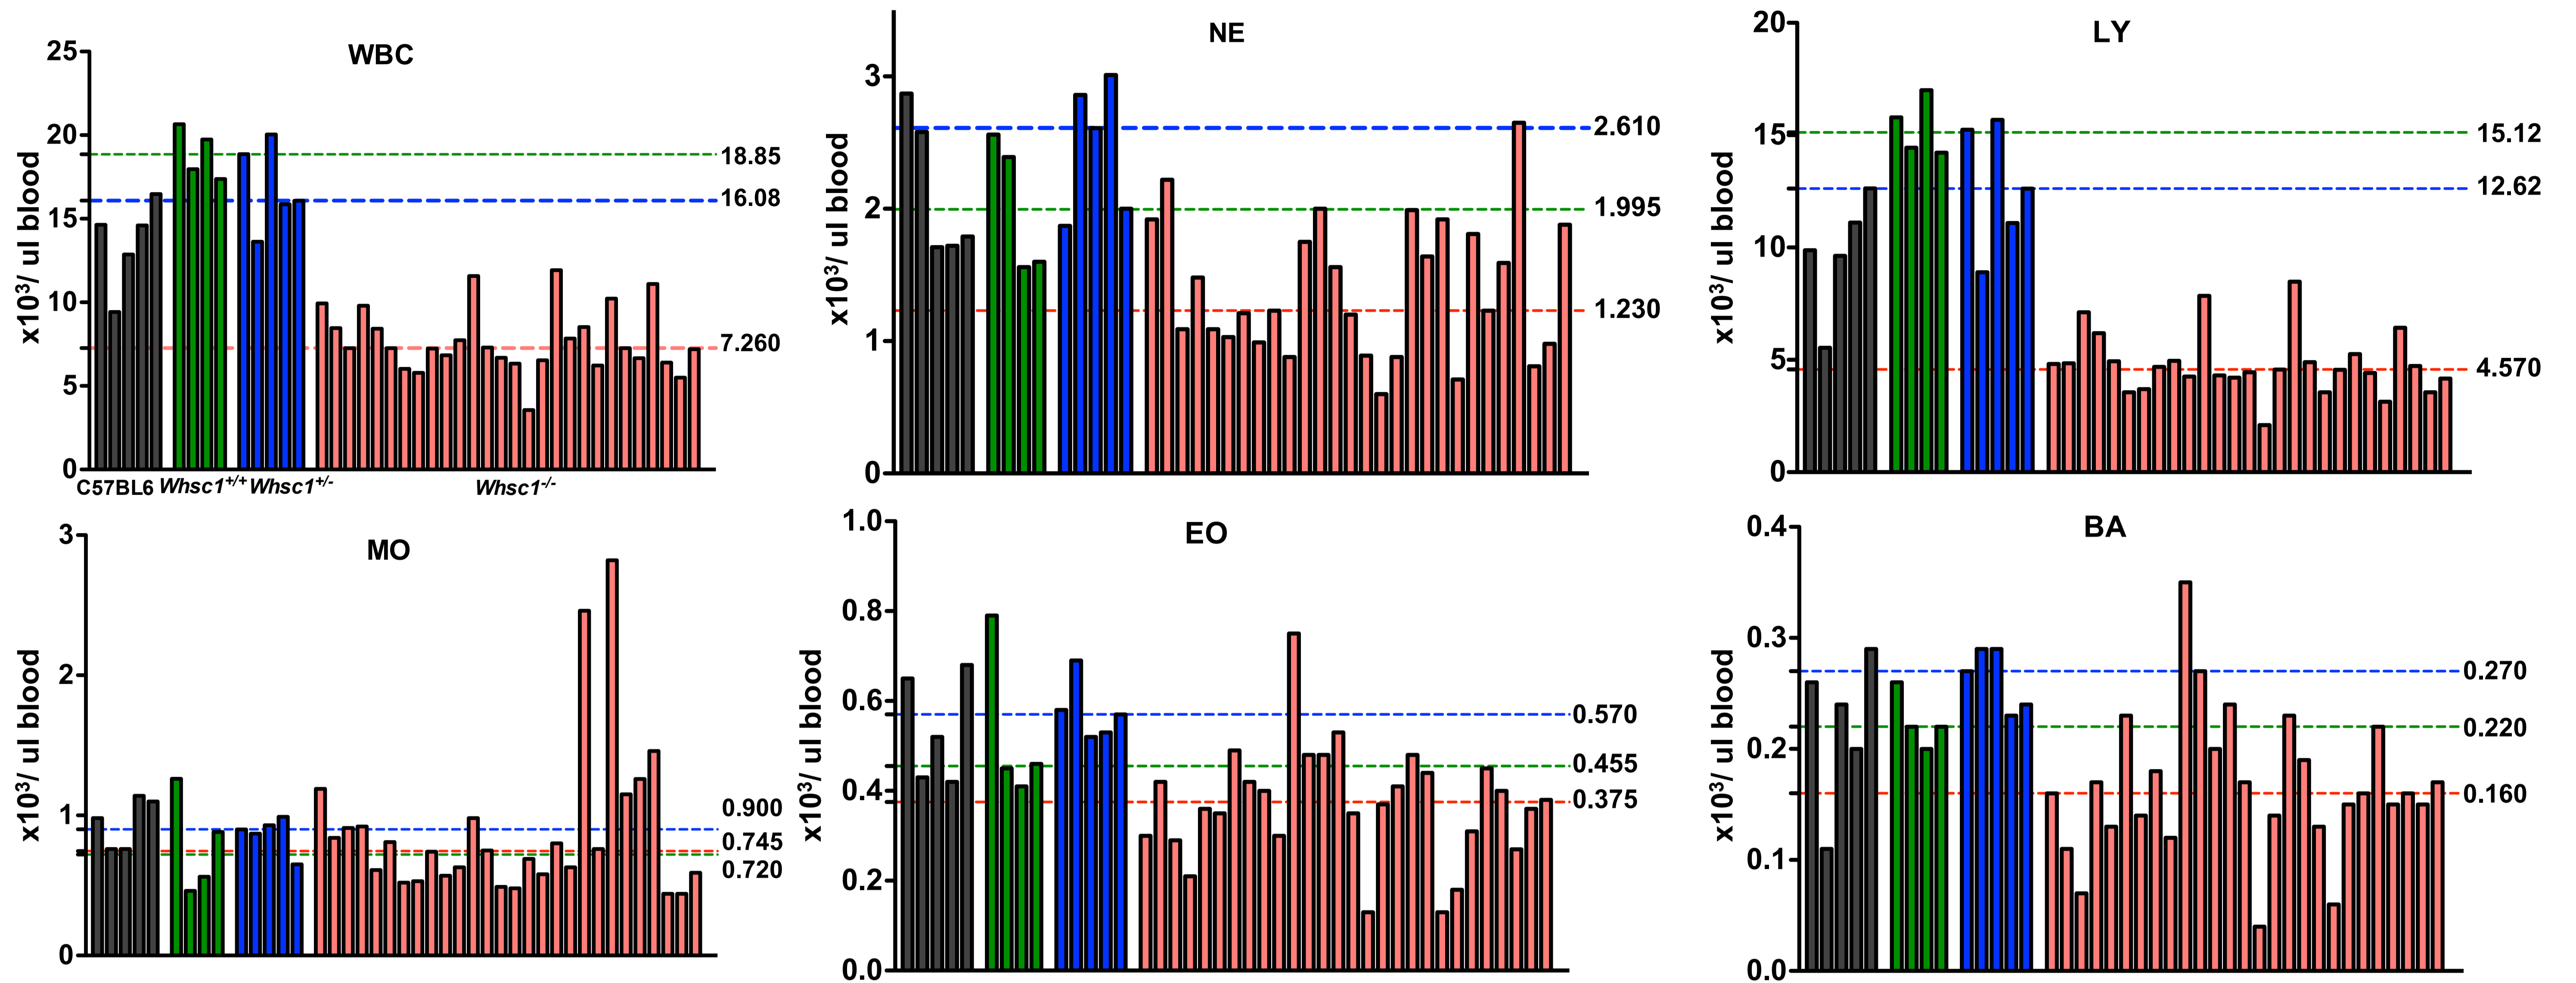

Red Blood Cells

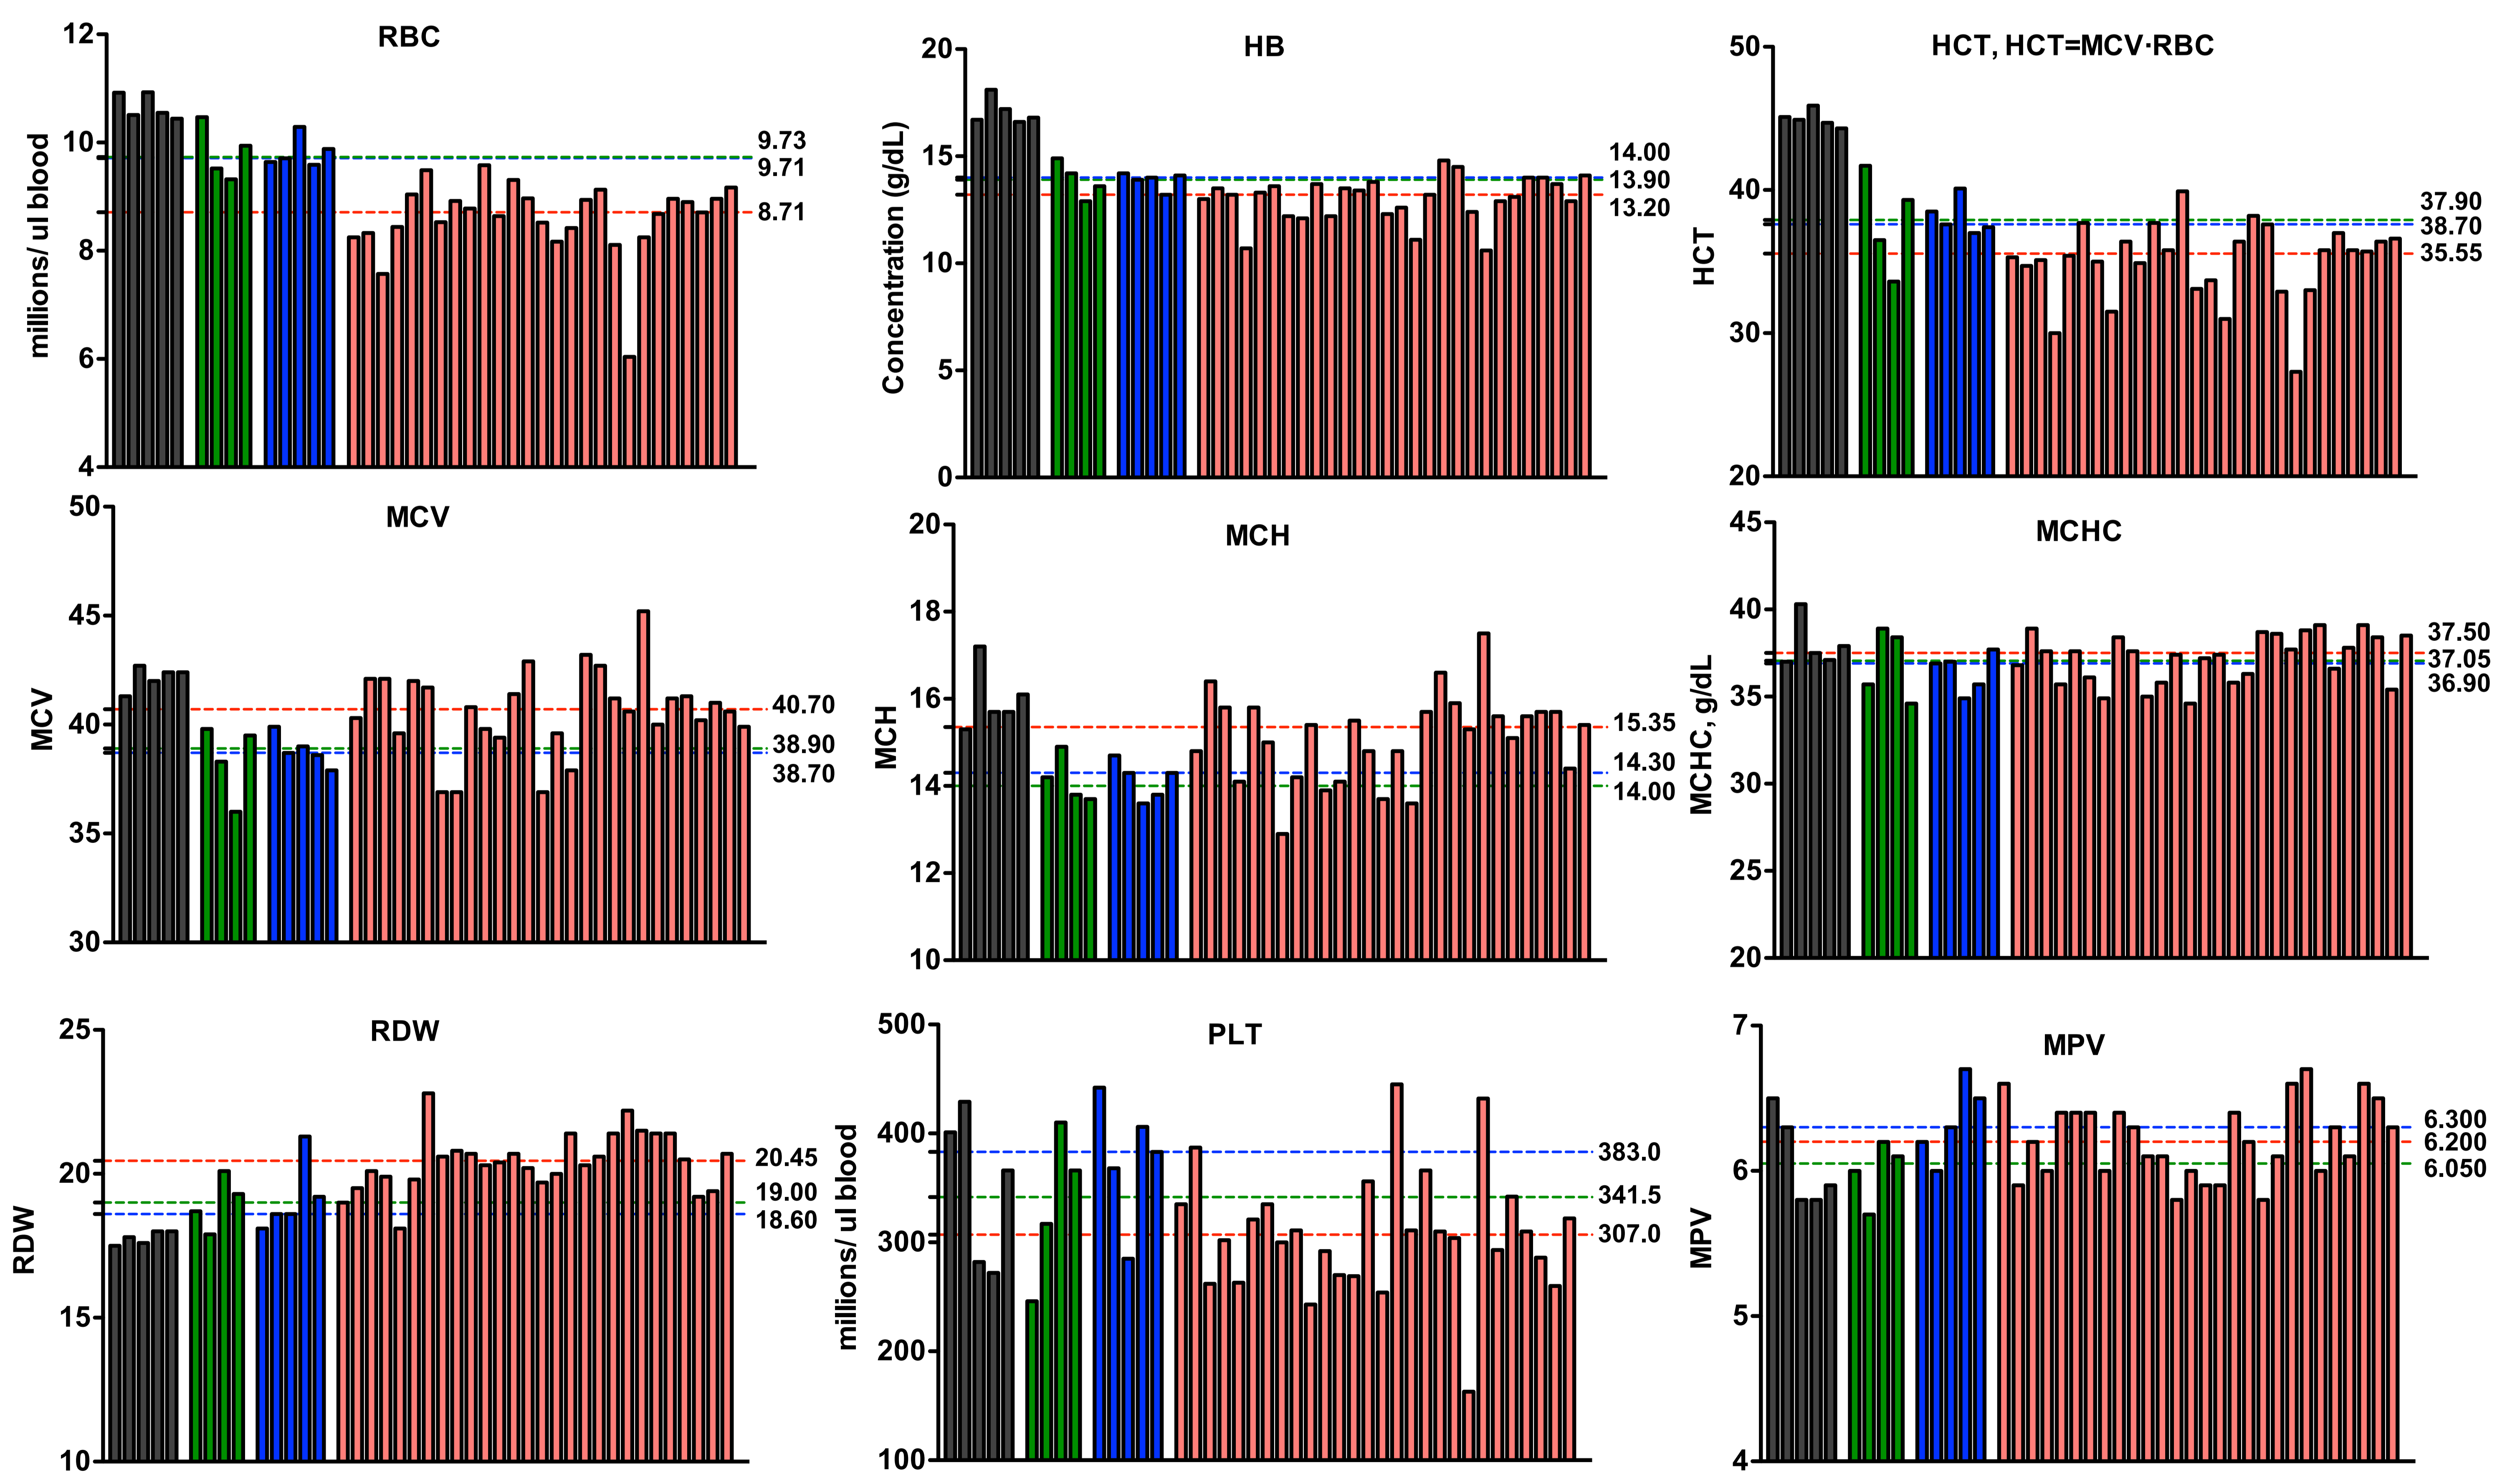

**Figure S2** (related to Figure 1). Full hematimetric analysis of recipients of a primary fetal liver transplant, showing the absolute numbers of the different blood cell types. Non-transplanted, WT C57Bl/6 mice were used as controls (leftmost bars, in black). Each bar represents an individual mouse. Green, blue and red dotted lines represents the median value for *Whsc1*<sup>+/+</sup>, *Whsc1*<sup>+/-</sup> and *Whsc1*<sup>-/-</sup> recipients, respectively.



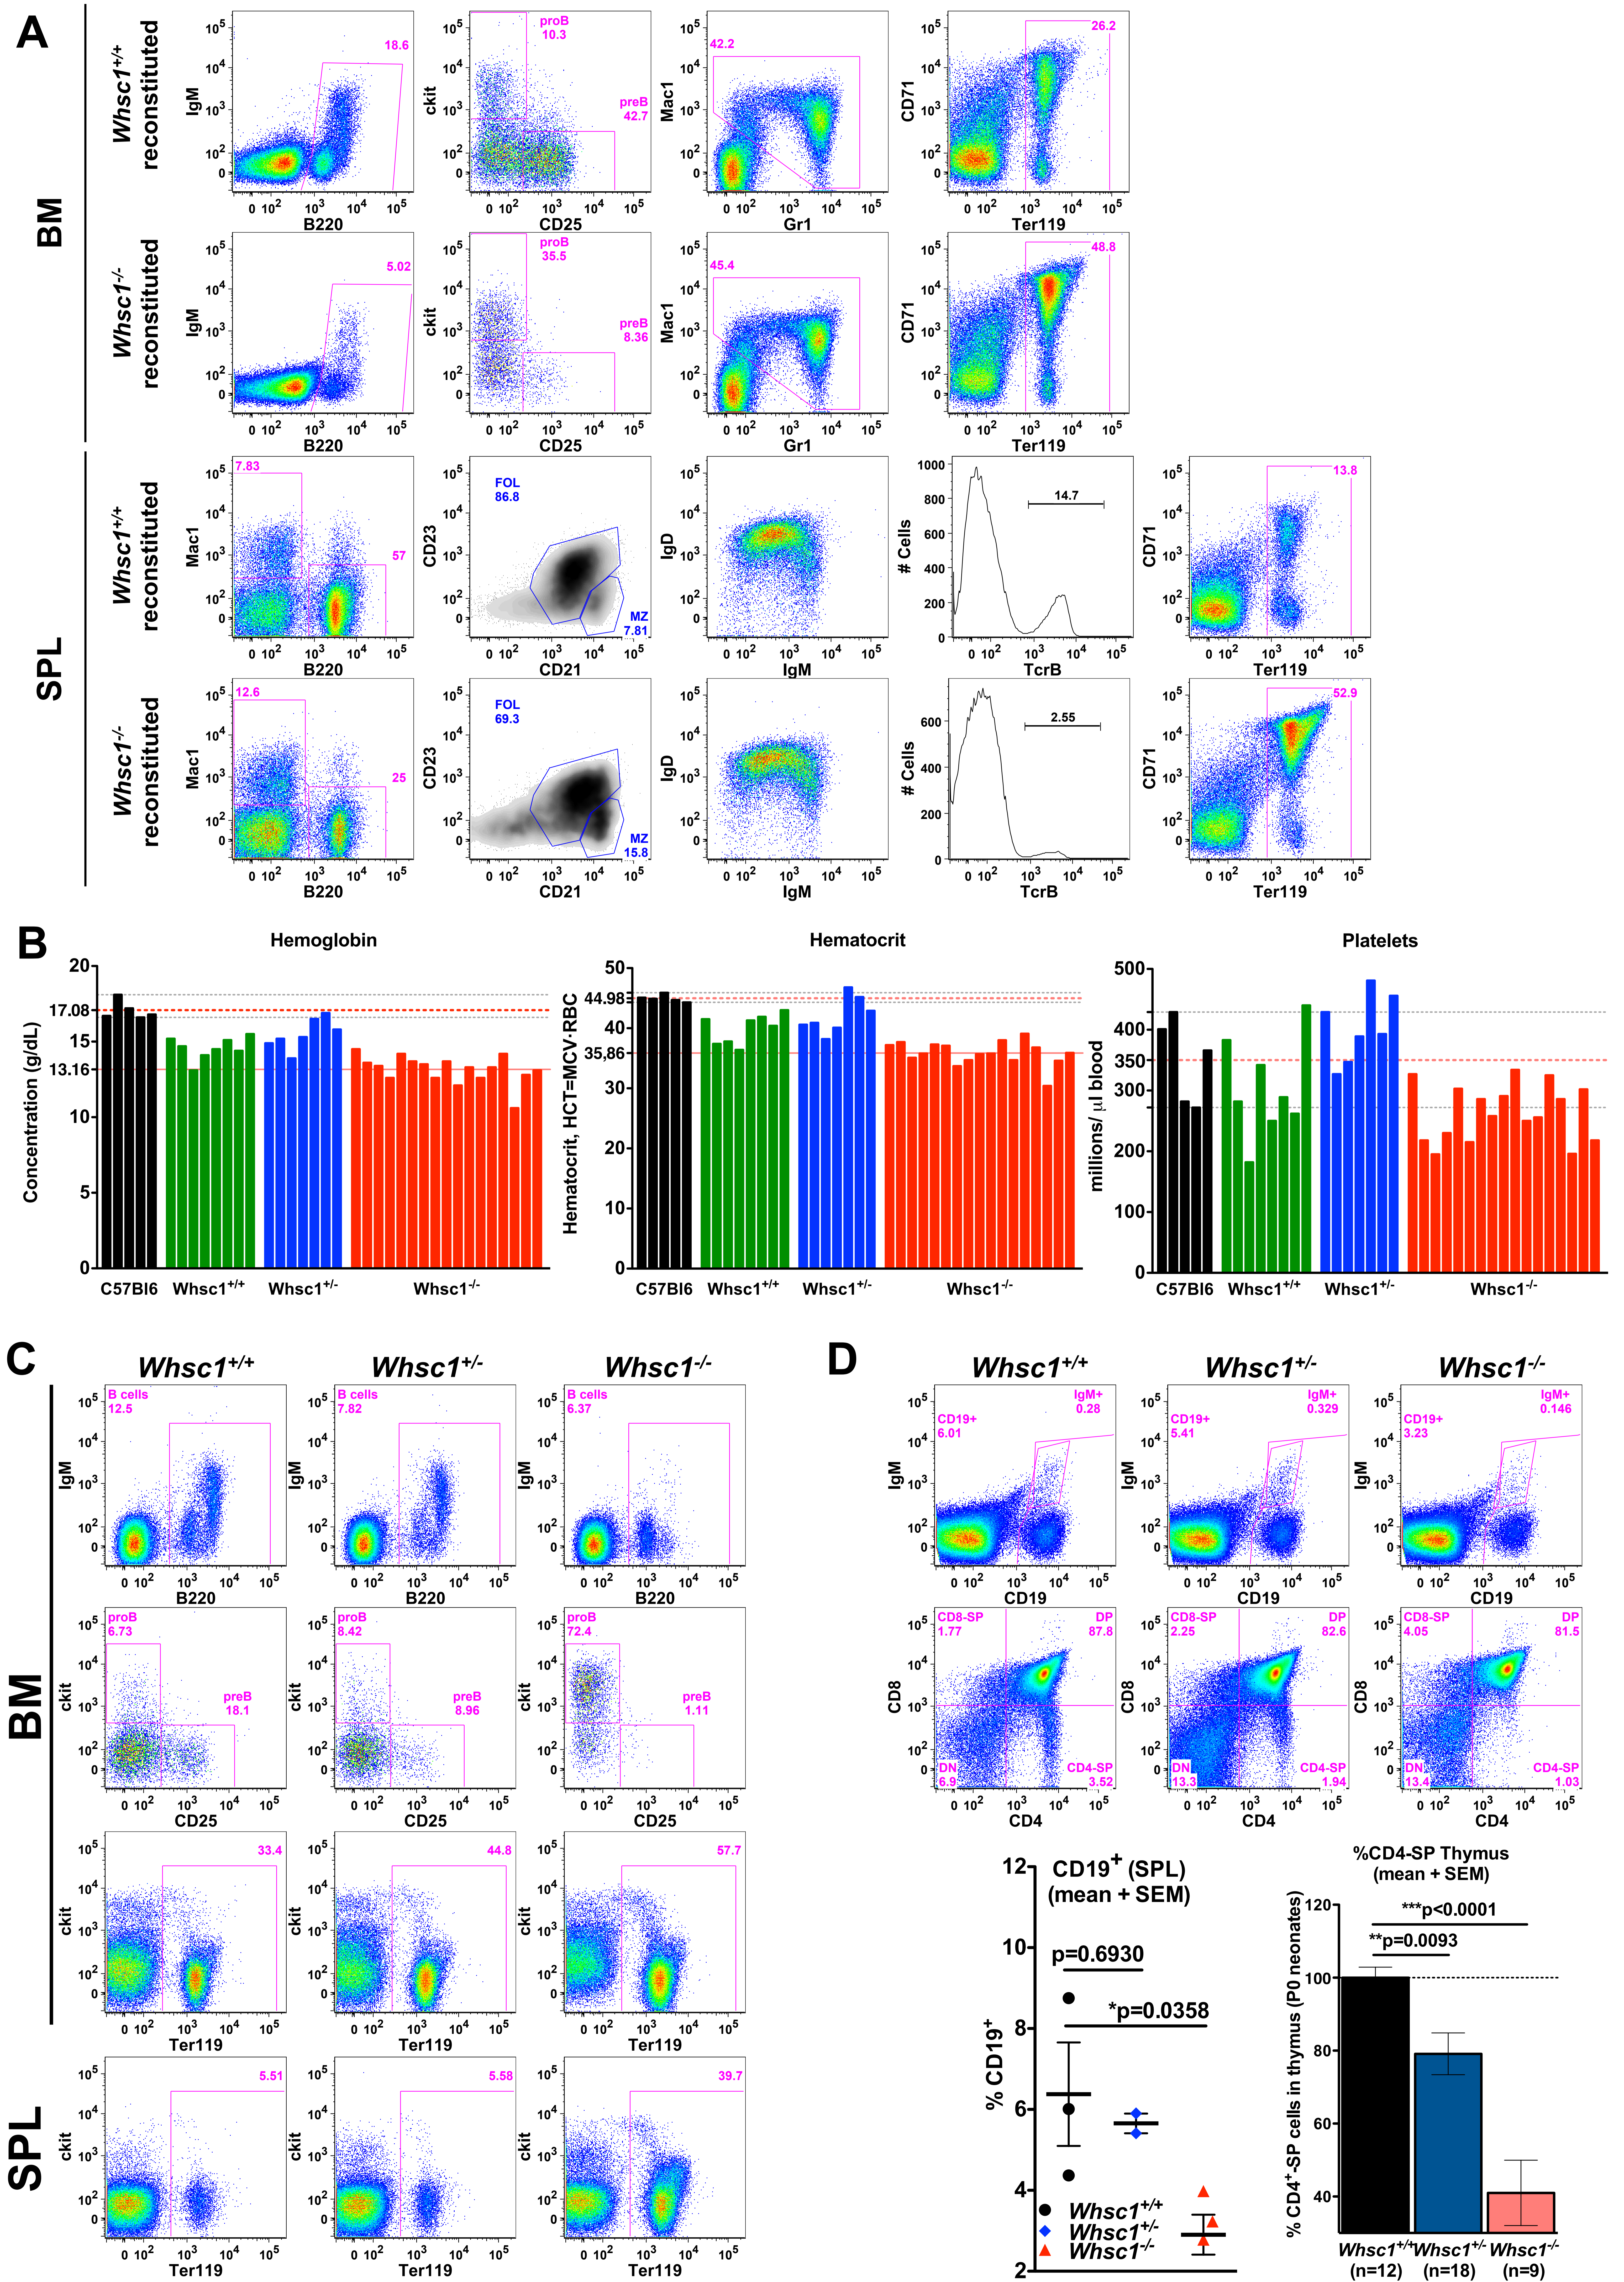

**Figure S3** (related to Figures 1 and 3) **(A)** Representative FACS plots of hematopoietic organs from mice primary reconstituted with either WT or *Whsc1*<sup>-/-</sup> FL cells, 3-6 months after FL transplant. **(B)** Absolute numbers of total blood erythrocytes, hemoglobin, hematocrit and platelets from mice reconstituted with a secondary serial transplant of either *Whsc1*<sup>+/+</sup>, *Whsc1*<sup>+/-</sup>, or *Whsc1*<sup>-/-</sup> cells, 6 weeks after transplant, as measured by automatic hematic biometry. Non-transplanted, WT C57Bl/6 mice were used as controls (leftmost bars). **(C)** Strengthening of the developmental block beyond the proB cell stage and presence of increased splenic erythrocytes in secondary recipients of *Whsc1*<sup>-/-</sup> cells. BM of the recipients of the indicated genotypes was analyzed 6 months after transplant. Data shown are representative FACS plots, out of 6 independently analyzed *Whsc1*<sup>-/-</sup> recipients, 4 *Whsc1*<sup>+/-</sup> recipients, and 4 *Whsc1*<sup>+/+</sup> **(D)** Hematopoietic alterations in *Whsc1*<sup>-/-</sup> embryos. FACS analysis of fetal spleen (upper row) and fetal thymi (lower row) of *Whsc1*<sup>-/-</sup> E21 embryos and their WT and heterozygous littermates. Lower left graph: percentages of CD19<sup>+</sup> cells in fetal spleens of the indicated genotypes. Lower right bar graph: percentages of CD4-SP T cells in fetal thymi of the indicated genotypes. n= number of embryos analyzed.



A

Experimental reconstituted B cell contribution through proliferation, *ex vivo*.  
72h under LPS stimulation

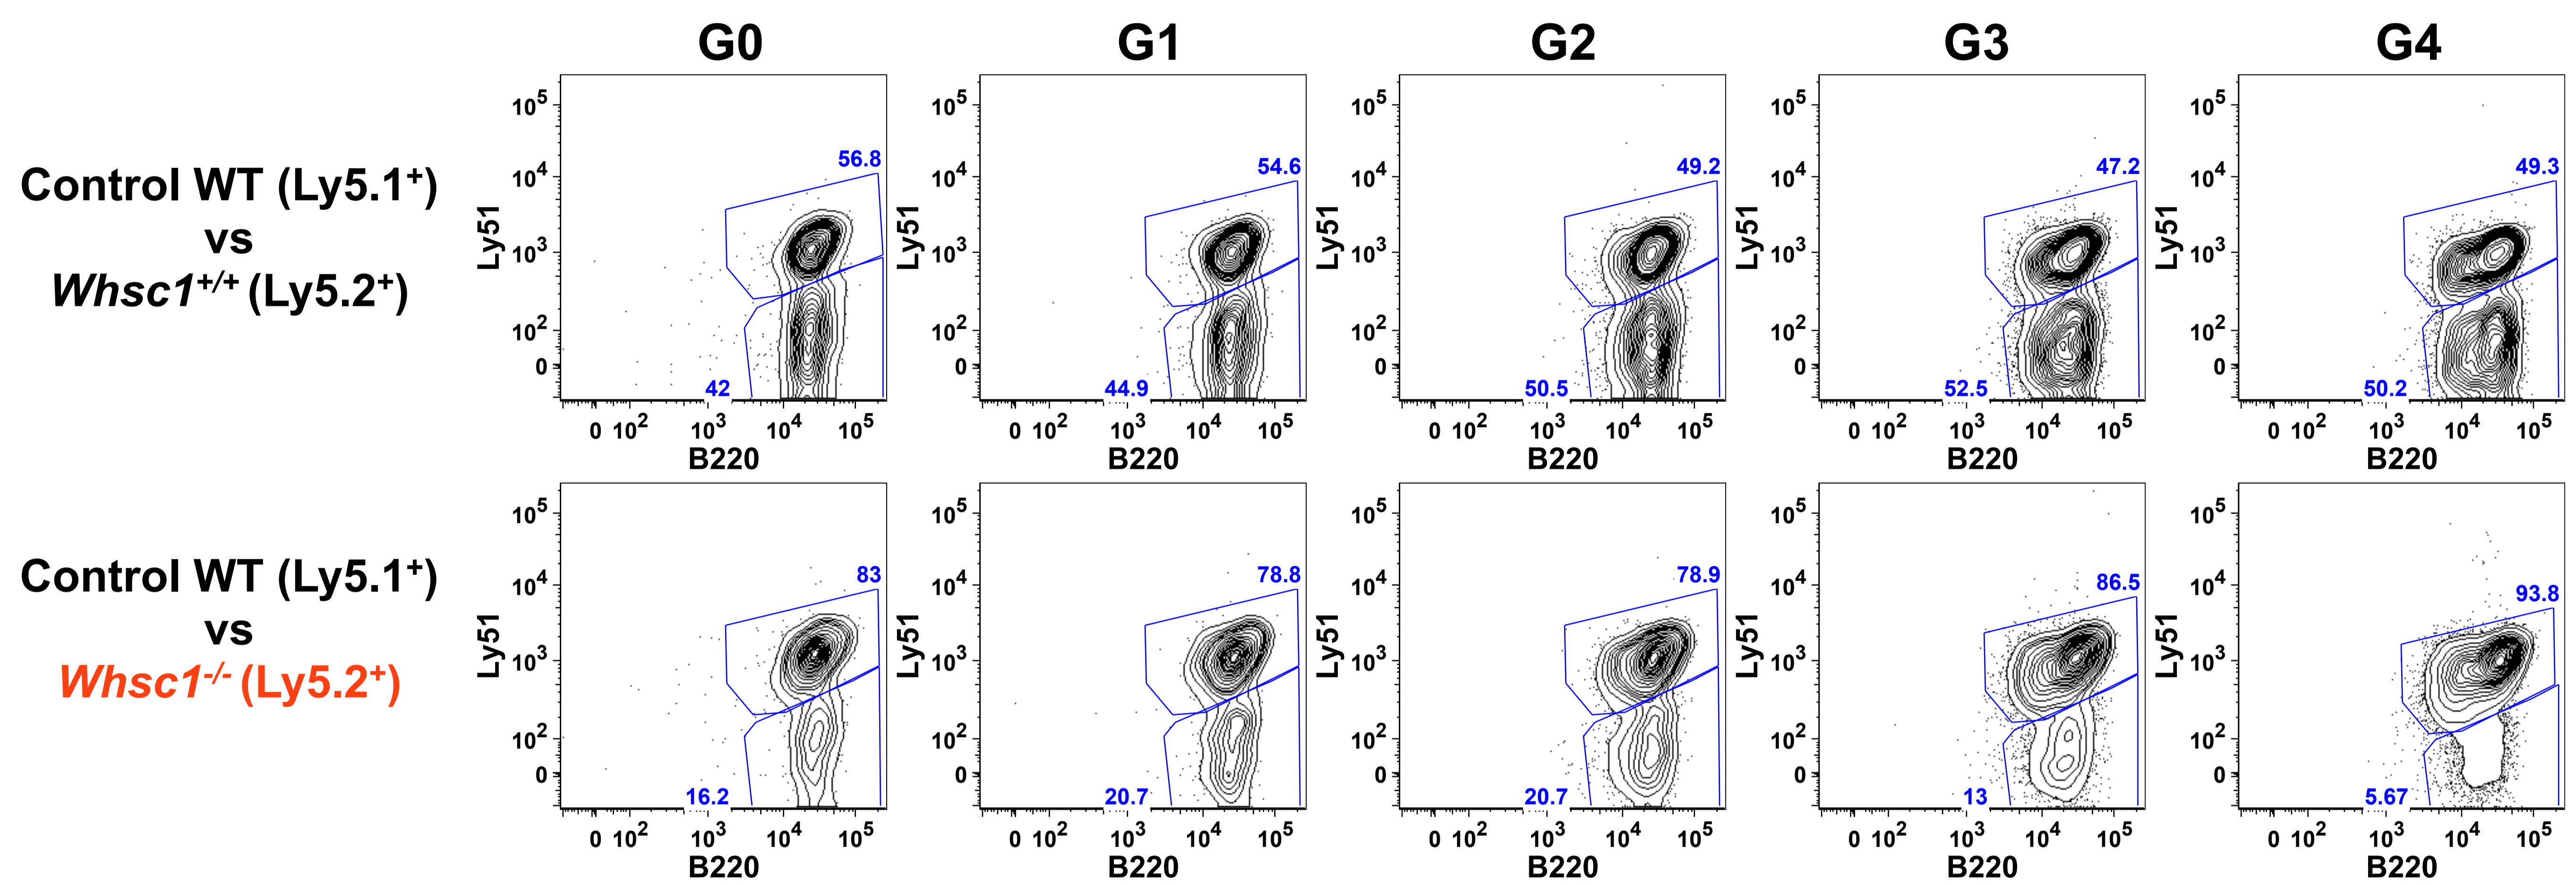

B

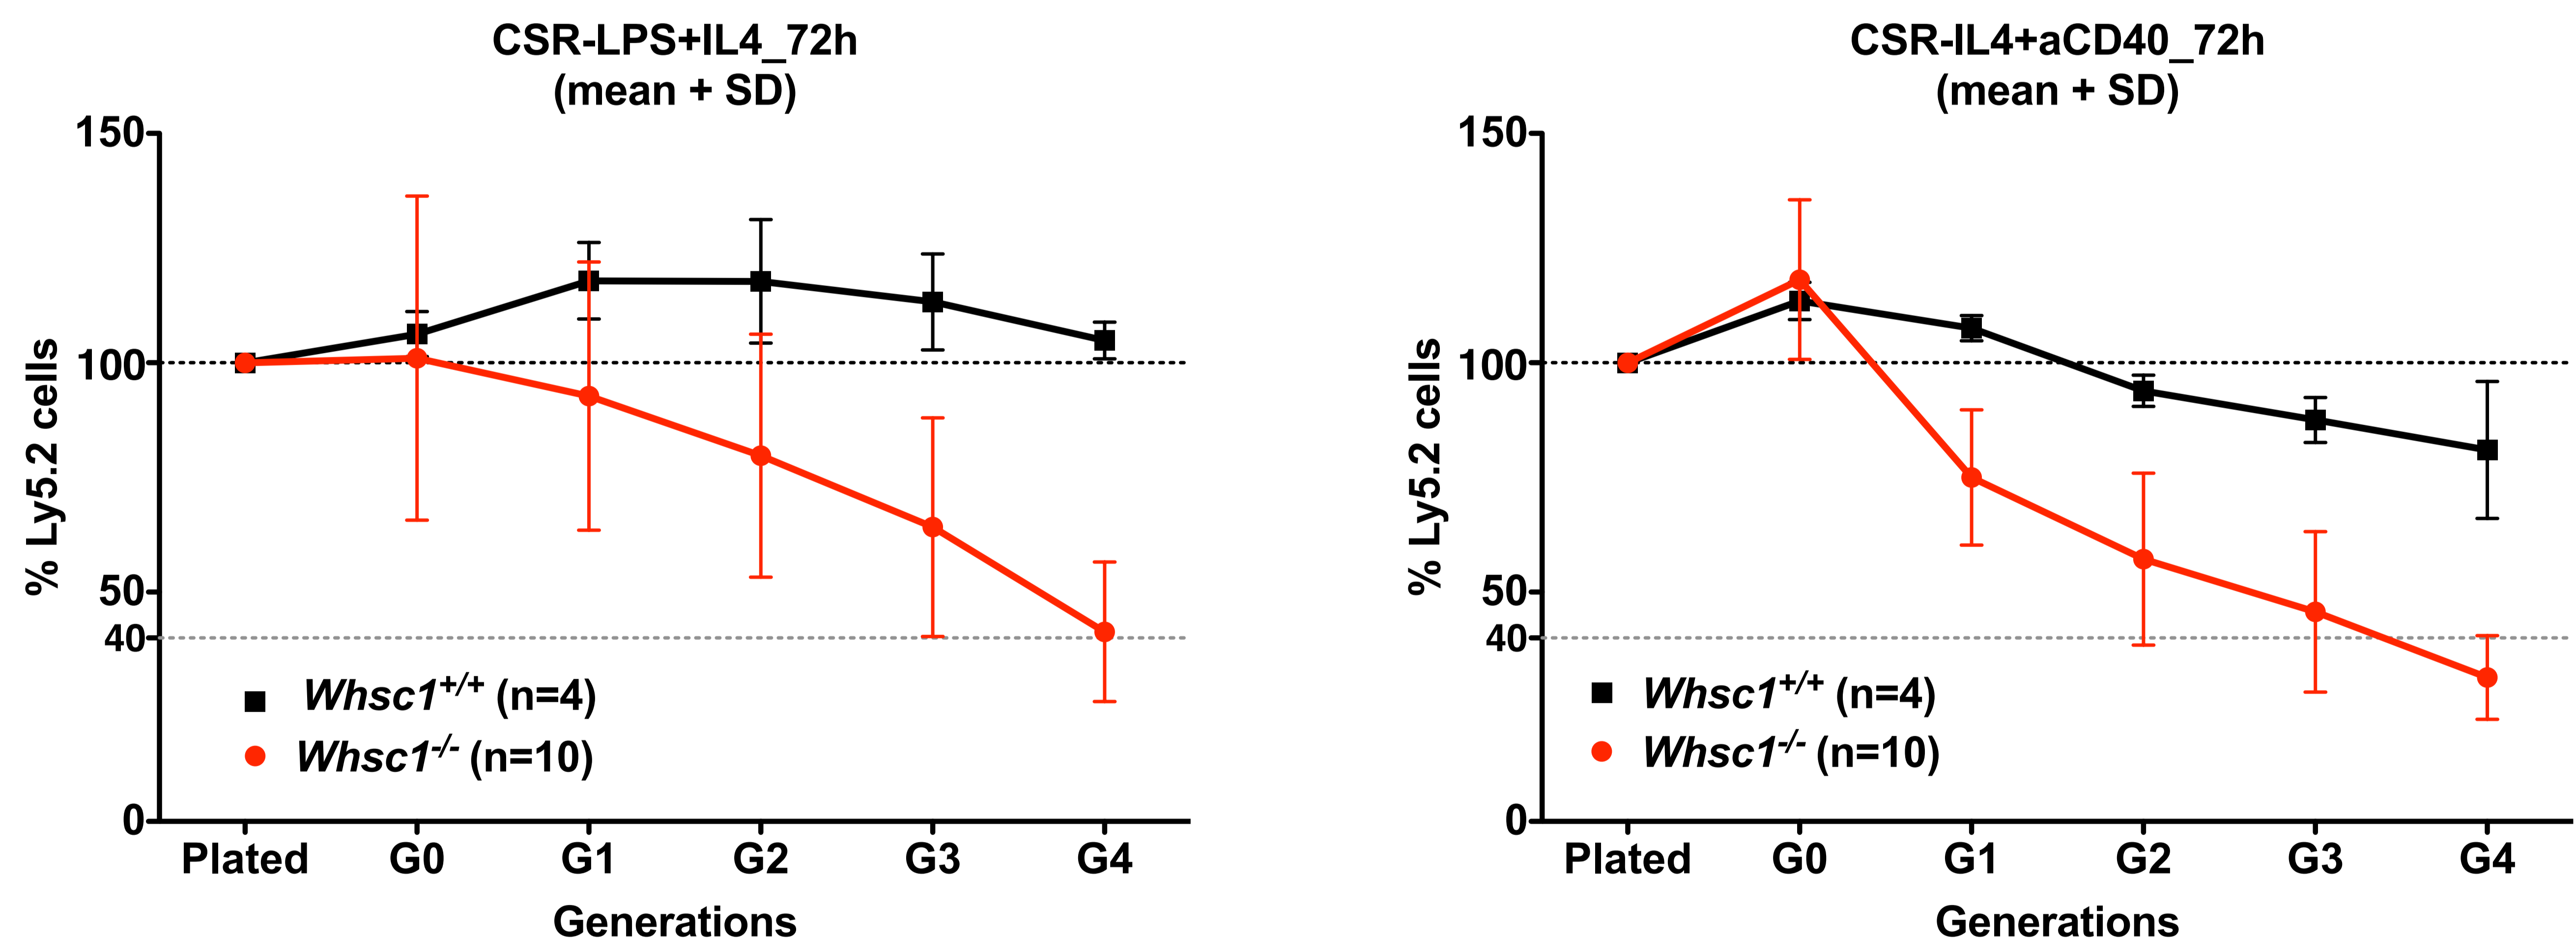

**Figure S4** (related to Figure 4) **(A)** Deconvolution of an ex vivo LPS-stimulation experiment, performed in competition, into the different cellular generations (G0 to G4) as identified by CellTrace dilution. The upper row shows a control experiment in which WT Ly5.1 cells compete with WT-reconstituted Ly5.2 cells, showing the even distribution of cells (approximately 50:50) throughout the generations. The lower row shows the competition of WT Ly5.1 cells with *Whsc1*<sup>-/-</sup> Ly5.2 cells (also 50:50), where the rapid and progressive reduction in the contribution of the latter can be clearly appreciated after 72 hours. **(B)** Evolution of the percentage of either WT or *Whsc1*<sup>-/-</sup> ex vivo stimulated Ly5.2 B cells, in competition against WT Ly5.1 B cells, along the different generations, and relative to the initial percentage when plated, with different stimulations. Mean  $\pm$  SD are shown.



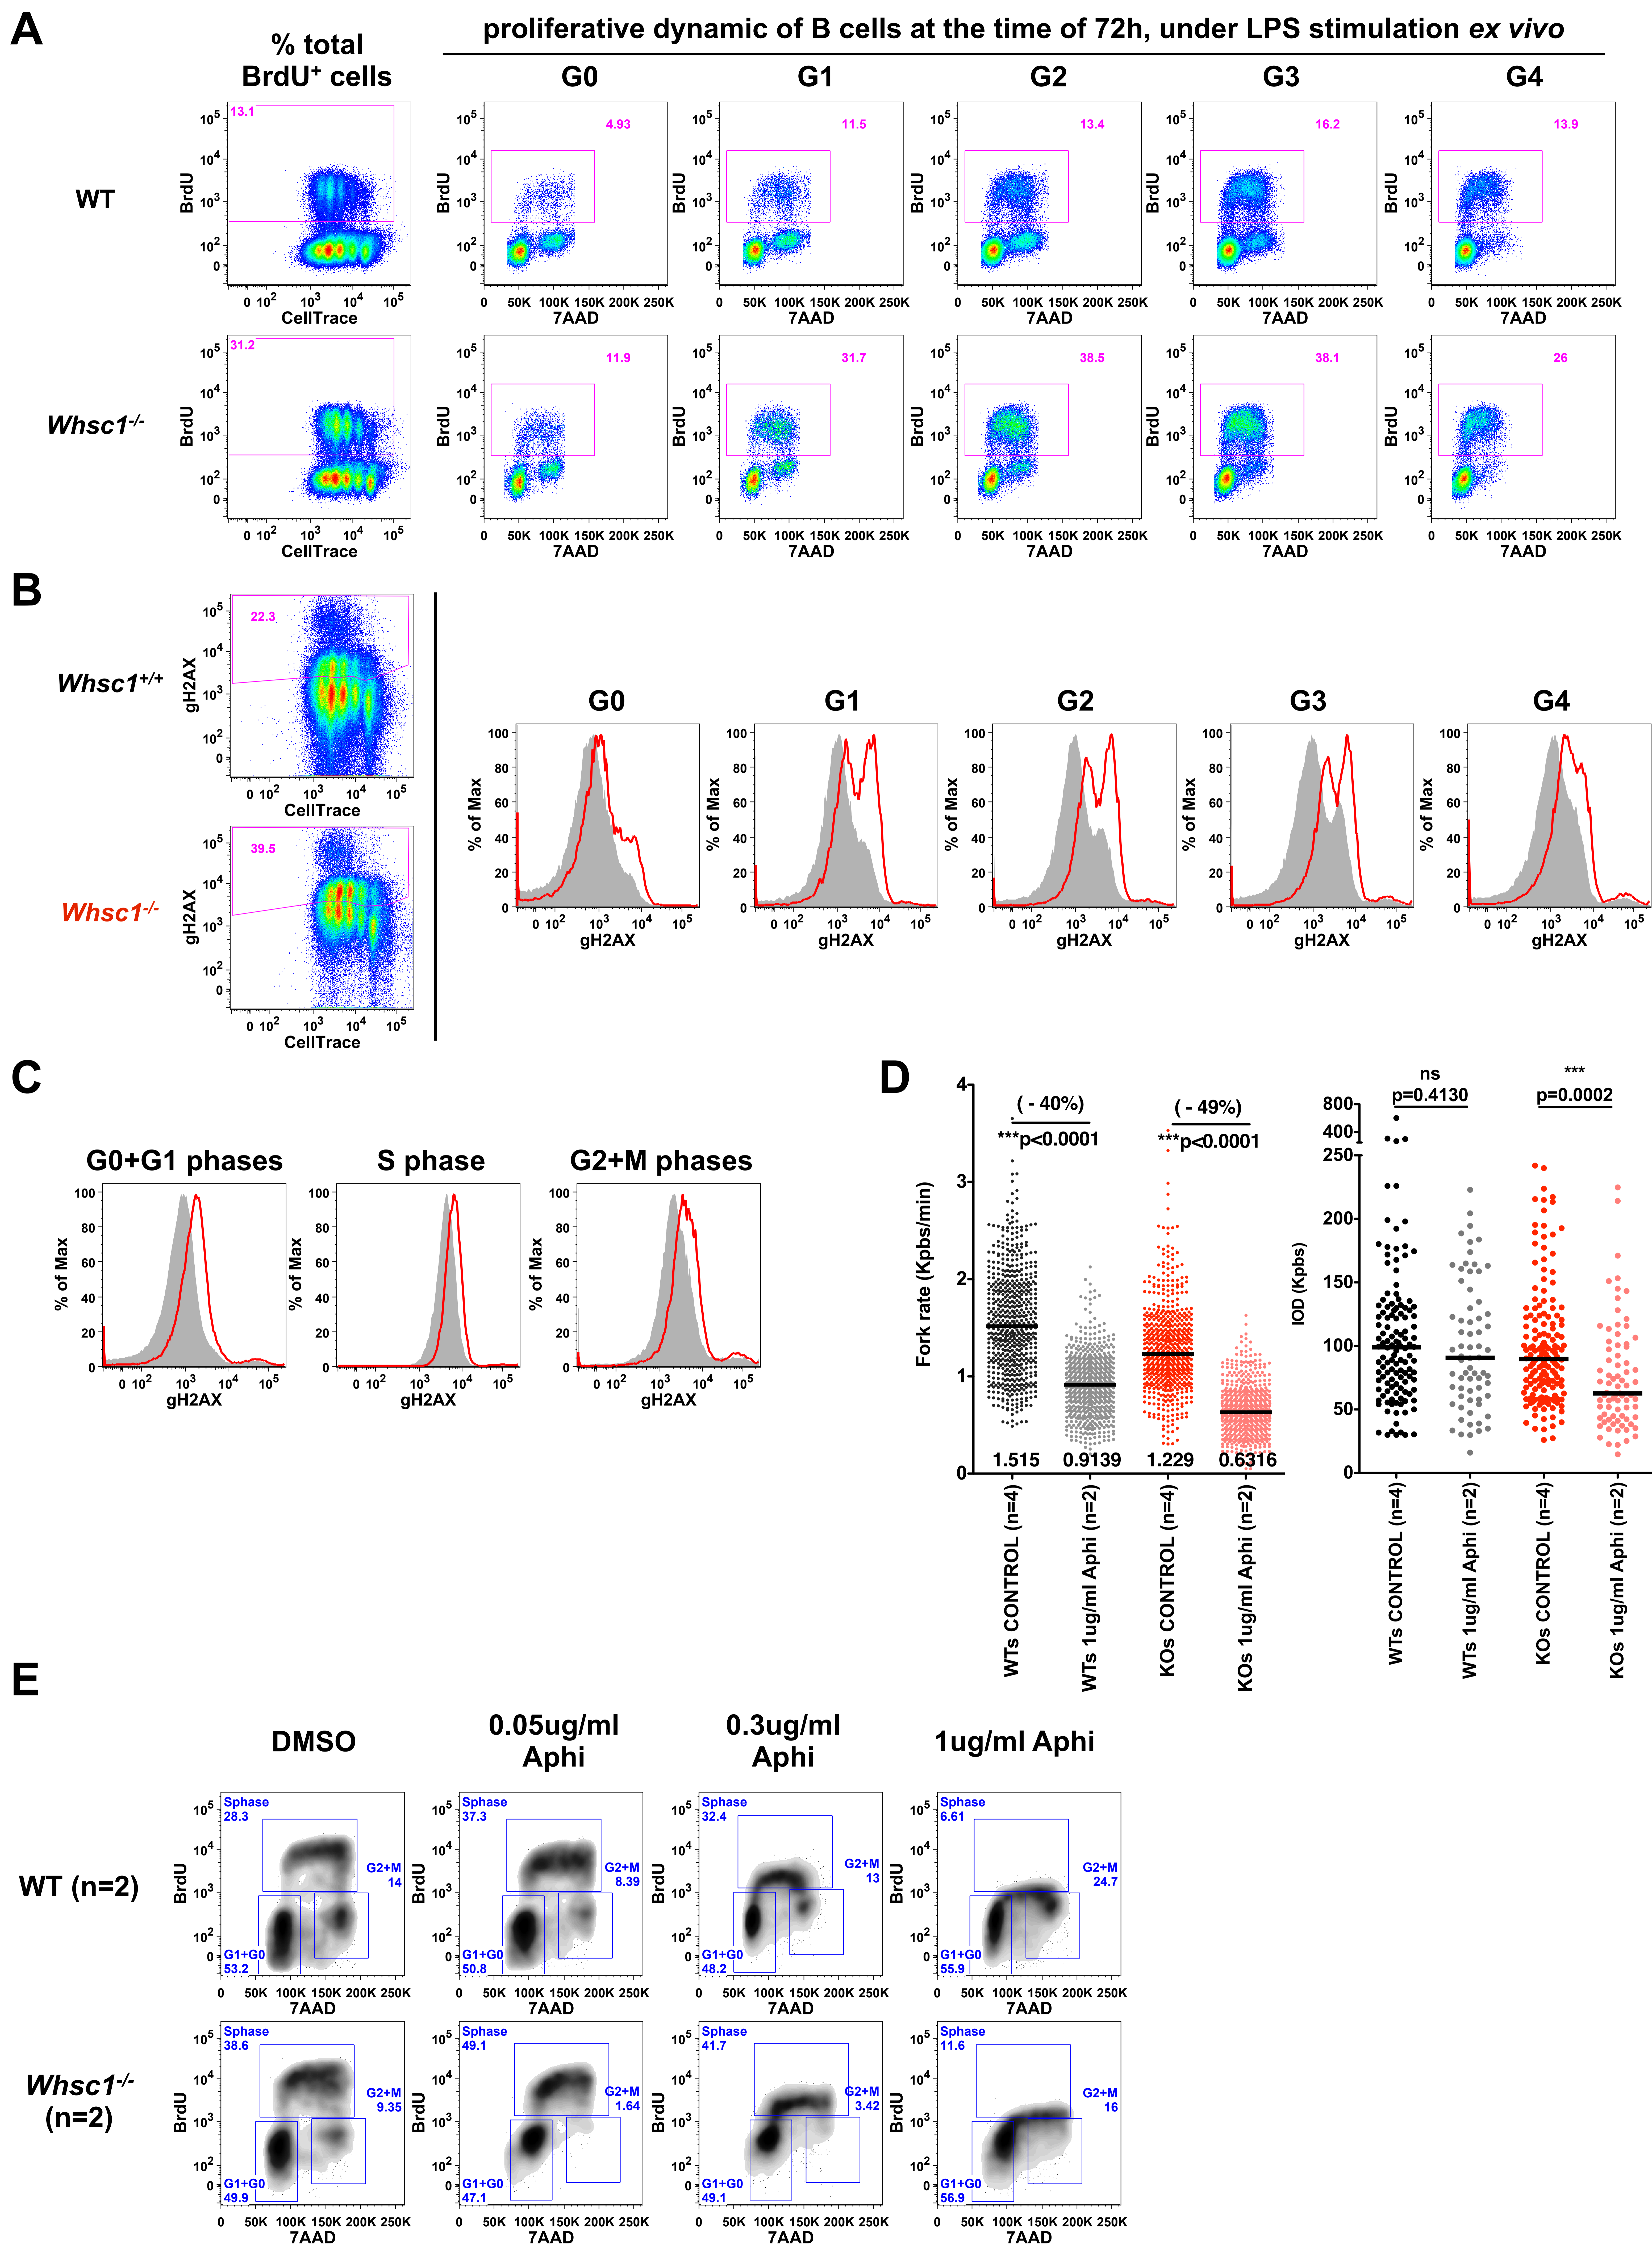

**Figure S5** (related to Figures 5 and 6) **(A)** Deconvolution of the population of LPS-stimulated, BrdU-labelled B cells into the different generations according to the dilution of the CellTrace dye. Cell cycle profile (BrdU vs. 7AAD) are shown for all the different generations (G0-G4) of cells, showing the generalized 3-fold increased percentage of *Whsc1*<sup>-/-</sup> cells in the S phase. Representative plots of two out of 10 mice analyzed. Four representative panels from this figure were selected for display in main Figure 5a **(B)** Deconvolution of the population of LPS-stimulated B cells into the different generations according to the dilution of the CellTrace dye, showing the progressive accumulation of  $\gamma$ H2AX in *Whsc1*<sup>-/-</sup> cells along all the different generations (G0-G4). Representative plots of two out of 7 mice analyzed. **(C)** Increased  $\gamma$ H2AX accumulation is distributed throughout all the stages of cell cycle in LPS-stimulated *Whsc1*<sup>-/-</sup> B cells. **(D)** DNA fiber analysis of MEFs in the presence of aphidicolin. Fork rate (left panel) in Kbps/min, and Inter Origin Distance, (IOD, right panel) in Kpbs were measured for WT (black or grey) or *Whsc1*<sup>-/-</sup> (red or pink) MEFs in the absence (black or red) or presence (grey or pink) of aphidicolin. n= number of different clones. Horizontal bar represents the median for each data column. **(E)** Flow cytometry cell cycle analysis of LPS-stimulated WT or *Whsc1*<sup>-/-</sup> B cells in the presence of increasing concentrations of aphidicolin. To avoid interference with accumulating apoptotic cells in the total population, the plots represent the second generation of dividing cells, as deconvoluted using the CellTrace dilution signal. The experiment was repeated twice.

A

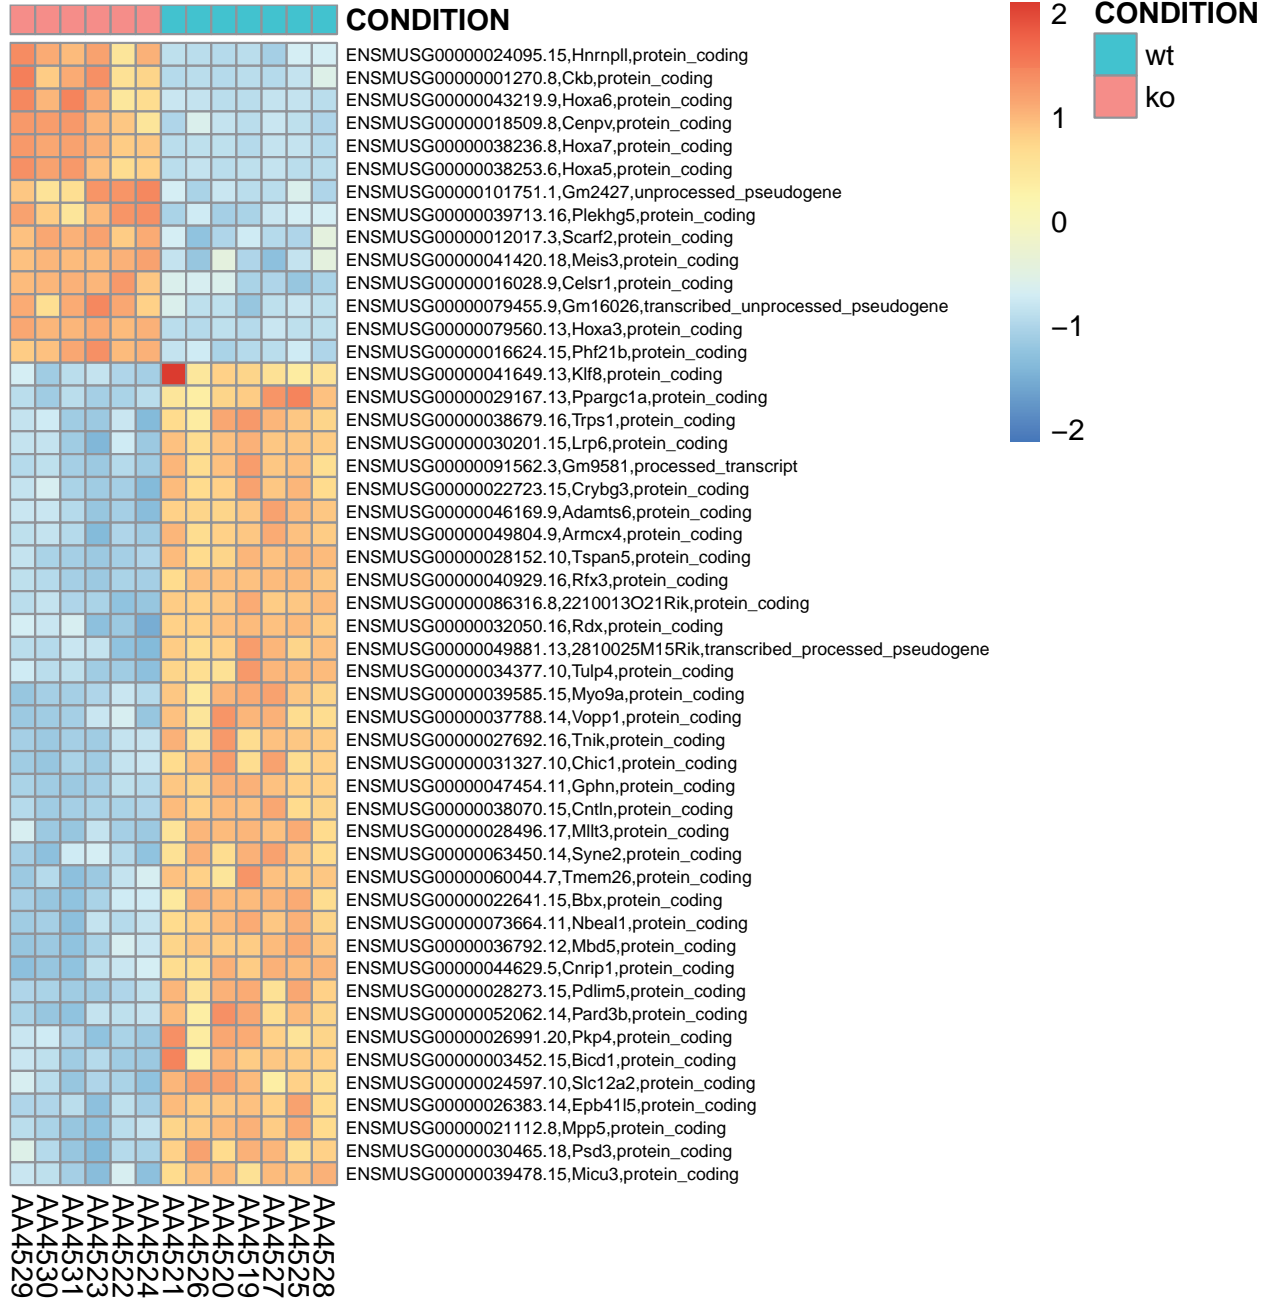



**Figure S6 (1<sup>st</sup> part)** (related to Figure 6) Differential expression analyses based on RNA-seq experiments of GC B cells. (A) Heatmap of the top 50 Differentially Expressed genes between WT and *Whsc1*<sup>-/-</sup> cells. (see [Figure 6B](#)).

CELL CYCLE

BCR\_SIGNALLING

DNA REPLICATION

DNA REPAIR

DNA REPAIR (cont)

FANCONI ANEM.

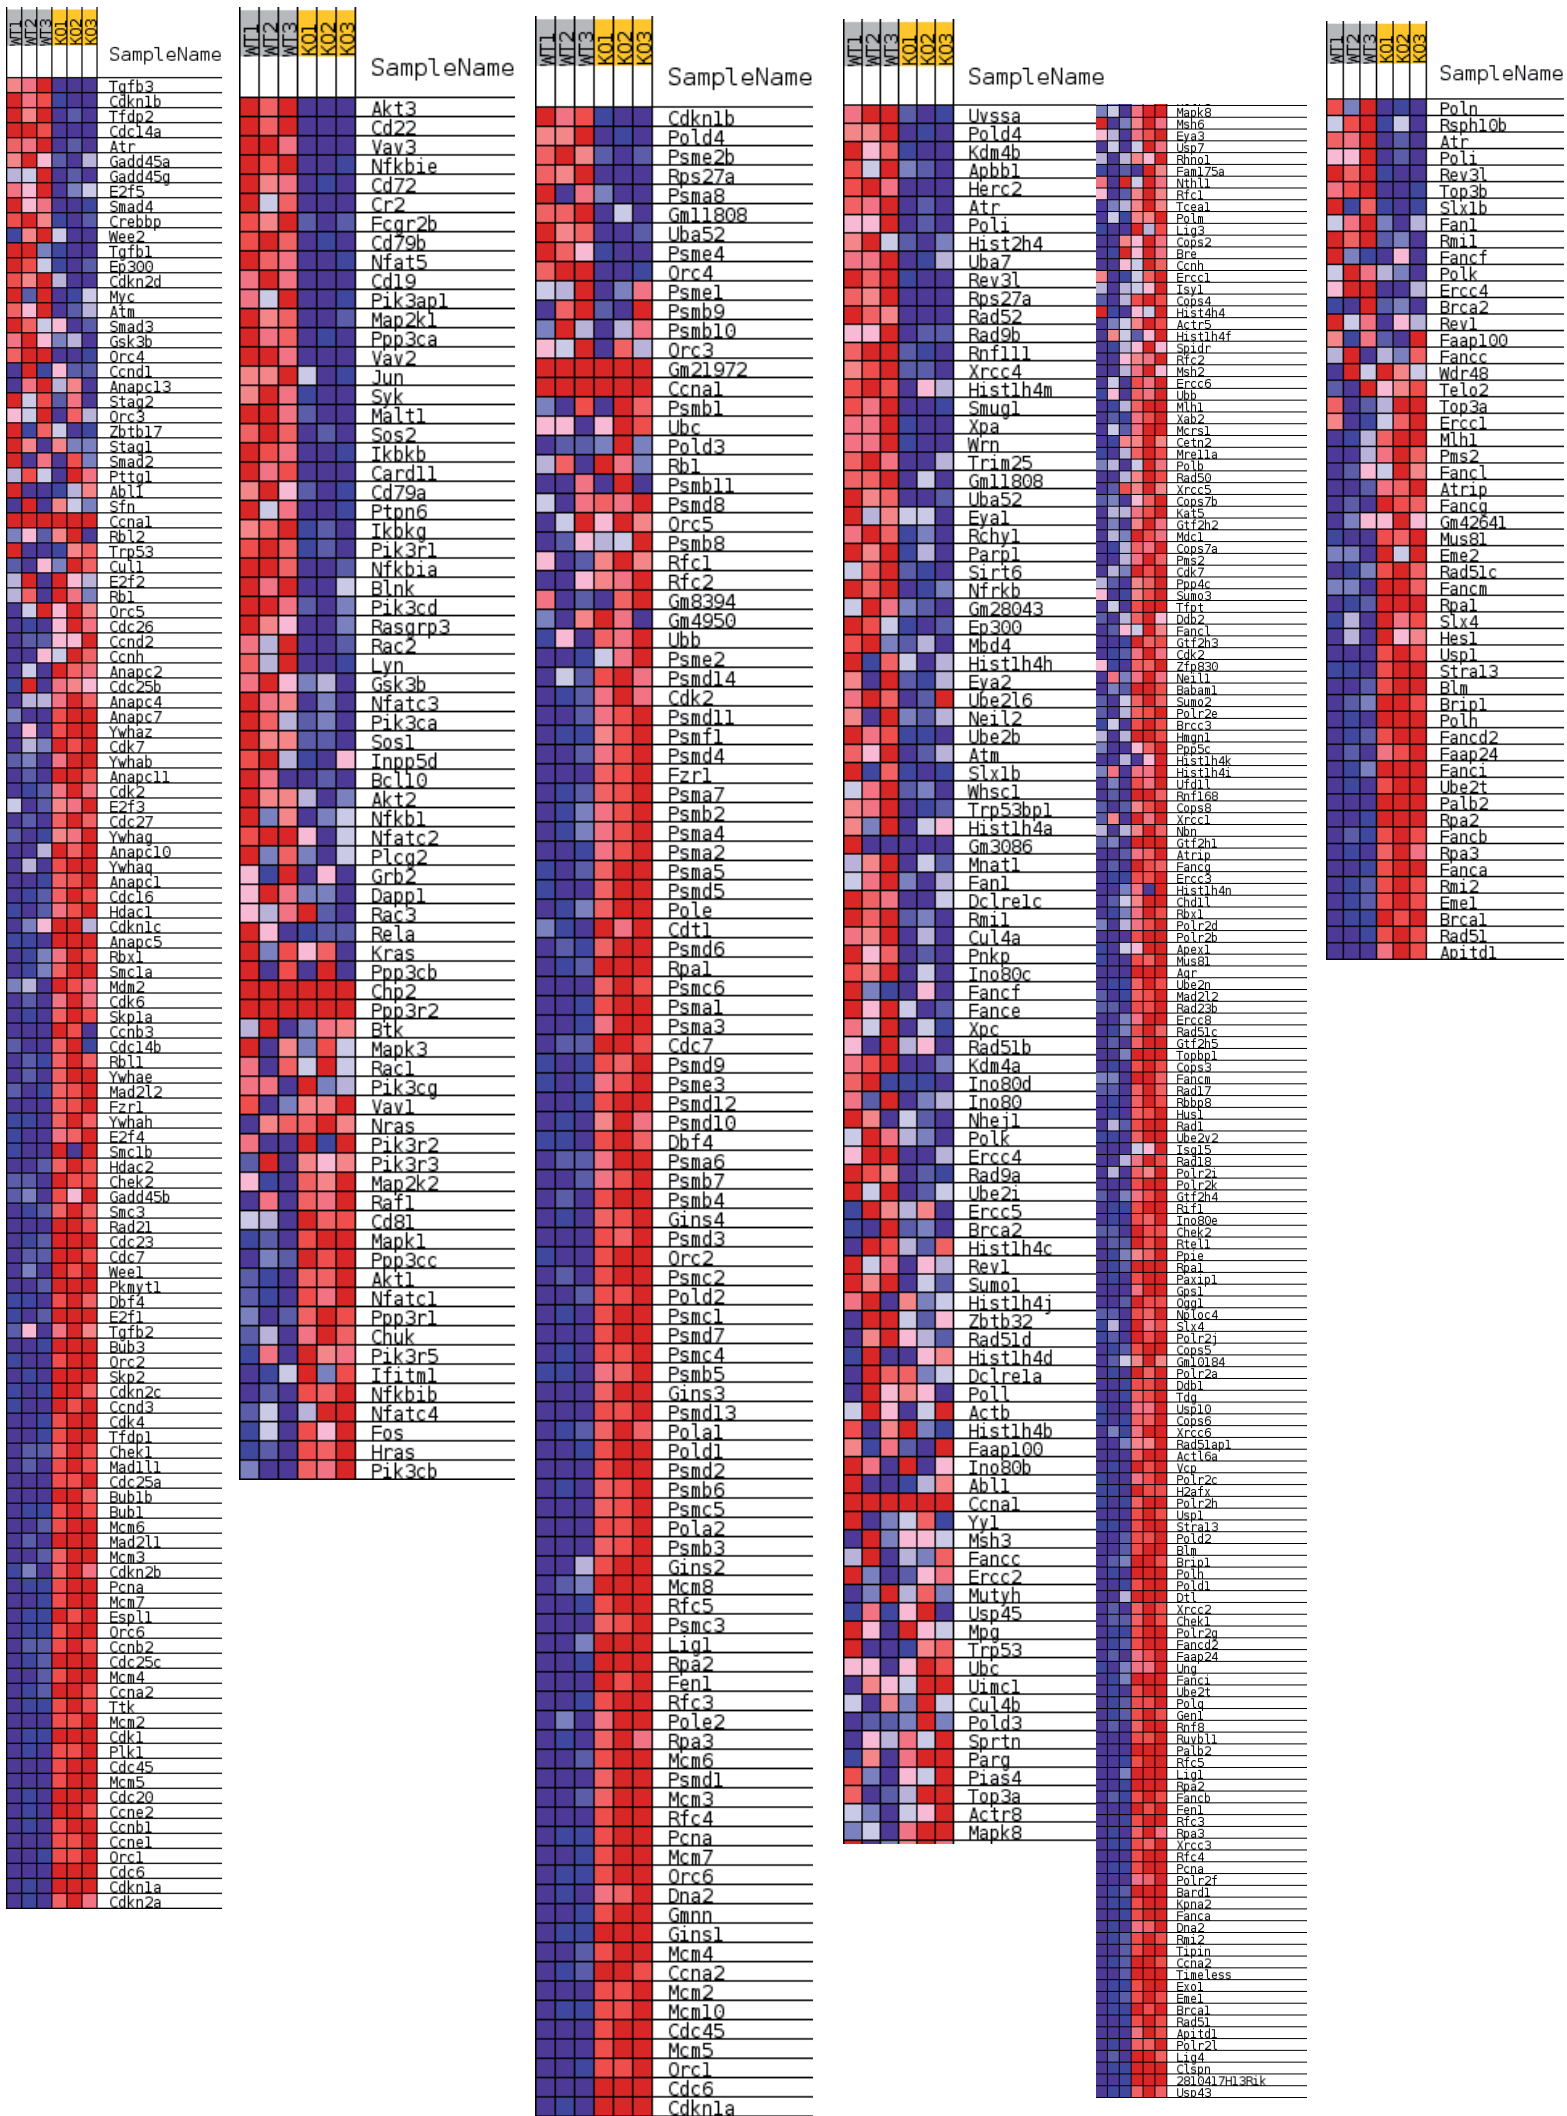

**Figure S6 (2<sup>nd</sup> part)** (related to Figure 6) Differential expression analyses based on RNA-seq experiments of GC B cells. **(B)** Gene Set Enrichment Analysis (GSEA) heatmap plots for the indicated genesets (see [Figure 6B](#)).





**Figure S7 (1<sup>st</sup> part)** (related to Figure 7) Differential expression analyses based on RNA-seq experiments of BM proB cells **(A)** Gene Set Enrichment Analysis (GSEA) heatmap plots for the indicated genesets affecting basic cellular processes (see [Figure 7A](#)). **(B)** GSEA heatmap plots for the Ebf1 and Pax5 up- or down-regulated genesets (see [Figure 7B,C](#)). **(C)** GSEA analysis and heatmap showing the general downregulation of immunoglobulin genes in *Whsc1*<sup>-/-</sup> proB cells. **(D)** Sorting strategy and purity of sorted proB cells.





**Figure S7 (2<sup>nd</sup> part)** (related to Figure 7) Differential expression analyses based on RNA-seq experiments of BM proB cells. **(B)** GSEA heatmap plots for the Ebf1 and Pax5 up- or down-regulated genesets (see [Figure 7B,C](#)). **(C)** GSEA analysis and heatmap showing the general downregulation of immunoglobulin genes in *Whsc1*<sup>-/-</sup> proB cells. **(D)** Sorting strategy and purity of sorted proB cells.

## SUPPLEMENTAL EXPERIMENTAL PROCEDURES

**Antibodies.** The antibodies used in this study were:

|                    | Clone         | Fluorochrome | Reference*             |
|--------------------|---------------|--------------|------------------------|
| Streptavidin       |               | FITC         | 554060                 |
| Anti-BrdU          |               | FITC         | 347583                 |
| CD8a               | 53-6.7        | FITC         | Inmunostep-M8AF-05MG   |
| CD4                | GK1.5         | FITC         | 553729                 |
| CD19               | 1D3           | FITC         | 553785                 |
| CD23               | B3B4          | FITC         | 553138                 |
| CD44               | IM7           | FITC         | 553133                 |
| CD71               | C2<br>(=C2F2) | FITC         | 553266                 |
| B220/CD45R         | RA3-6B2       | FITC         | 553088                 |
| Gr1/Ly6G           | RB6-8C5       | FITC         | 553127                 |
| IgM                | II/41         | FITC         | 553437                 |
| IgD                | 11-26c.2a     | FITC         | 553439                 |
| Ly5.1 (CD45.1)     | A20           | FTIC         | 553775                 |
| Streptavidin       |               | PE           | 554061                 |
| CD3ε               | 145-2c11      | PE           | 553064                 |
| CD4                | GK1.5         | PE           | 557308                 |
| CD5                | 53-7,3        | PE           | 552023                 |
| CD8a               | 53-6.7        | PE           | 553033                 |
| CD11c              | HL3           | PE           | 553802                 |
| CD19               | 1D3           | PE           | 553786                 |
| CD21               | 7G6           | PE           | 552957                 |
| CD95/FAS           | Jo2           | PE           | 554258                 |
| B220/CD45R         | RA3-6B2       | PE           | 553090                 |
| Gr1/Ly6G           | RB6-8C5       | PE           | 553128                 |
| Mac1/CD11b         | M1/70         | PE           | 553311                 |
| Pan-NK cells/CD49b | DX5           | PE           | 553858                 |
| TCR-gamma_delta    | GL3           | PE           | 553178                 |
| Ter119             | Ter119        | PE           | 553673                 |
| IgM                | II/41         | PE           | eBioscience 12-5790    |
| Anexina V          |               | PE           | 559763 (kit apoptosis) |
| Streptavidin       |               | APC          | 554067                 |
| CD8a               | 53-6.7        | APC          | 553035                 |
| CD25               | PC61          | APC          | 557192                 |
| CD44               | IM7           | APC          | 559250                 |
| CD117/c-Kit        | 2B8           | APC          | 553356                 |
| B220/CD45R         | RA3-6B2       | APC          | 553092                 |
| IgD                | 11-26c        | APC          | eBioscience 17-5993    |
| IgM                | II/41         | APC          | 550676                 |
| Mac1/CD11b         | M1/70         | APC          | 553312                 |

|                         |              |                      |                        |
|-------------------------|--------------|----------------------|------------------------|
| Ly5.1 (CD45.1)          | A20          | APC                  | 558701                 |
| Ly5.2 (CD45.2)          | 104          | APC                  | 558702                 |
| TcrB                    | H57-597      | APC                  | 553174                 |
| Streptavidin            |              | PerCP-Cy5.5          | 551419                 |
| B220/CD45R              | RA3-6B2      | PerCP-Cy5.5          | 552771                 |
| CD25                    | PC61         | PerCP-Cy5.5          | 551071                 |
| CD117/c-Kit             | 2B8          | APCeFluor780         | eBioscience 47-1171    |
| Sca1/(Ly-6A/E)          | D7           | PE-Cy5               | eBioscience 15-5981    |
| IL7R $\alpha$ /CD127    | A7R34        | PE-Cy7               | eBioscience 25-1271    |
| Streptavidin            |              | APC-Cy7              | 554063                 |
| B220/CD45R              | RA3-6B2      | Pacific Blue         | 558108                 |
| CD4                     | RM4-5 (L3T4) | Pacific Blue         | 558107                 |
| c-Kit(CD117)            | 2B8          | Violet V-450         | 560558                 |
| c-Kit (CD117)           | 2B8          | Brilliant Violet 421 | Biolegend 105827       |
| CD23                    | B3B4         | BIOTIN               | 553137                 |
| CD138/Syndecan          | 281-2        | BIOTIN               | 553713                 |
| Flt3/CD135/Flk2/Ly72    | A2F10        | Biotin               | eBioscience 13-1351    |
| IgA                     | C10-1        | Biotin               | 556978                 |
| IgE                     | R35-118      | Biotin               | 553419                 |
| IgG1                    | A85-1        | Biotin               | 553441                 |
| IgG2a[b]                | 5.7          | Biotin               | 553504                 |
| IgG2b                   | RMG2b-1      | Biotin               | Biolegend 406704       |
| IgG3                    | R40-82       | Bitin                | 553401                 |
| IgM                     | II/41        | BIOTIN               | 553436                 |
| Ly5.2 (CD45.2)          | 104          | BIOTIN               | 553771                 |
| Anexina V               |              | BIOTIN               | 556418 (kit apoptosis) |
| 7-AAD                   |              |                      | 559763 (Kit apoptosis) |
| Propidium Iodide, PI    |              |                      | Sigma P4170            |
| CD16/CD32 FcBlock       | 2.4G2        | Purified             | 553142                 |
| PNA (Peanut agglutinin) |              | FITC                 | Vector Labs. FL-1071   |

\* BD Biosciences, except otherwise specified

#### Surface Markers of Hematopoietic Cell types.

| Hematopoietic Population                    | Organ       | Markers                                                 | Additional information                                          |
|---------------------------------------------|-------------|---------------------------------------------------------|-----------------------------------------------------------------|
| Hematopoietic Stem/Progenitor Cells (HS/PC) | Bone Marrow | Lin <sup>-</sup> Sca1 <sup>hi</sup> c-Kit <sup>hi</sup> | Lineage (Lin) [1]: B220, CD19, CD3 $\epsilon$ , CD4, CD8a, DX5, |

|                                   |                                                              |                                                                                                      |                                                                  |
|-----------------------------------|--------------------------------------------------------------|------------------------------------------------------------------------------------------------------|------------------------------------------------------------------|
|                                   |                                                              |                                                                                                      | Gr1, Mac1, CD11b, and Ter119                                     |
| Common Lymphoid Progenitors (CLP) | Bone Marrow                                                  | Lin <sup>-</sup> , Sca1 <sup>int</sup> , c-Kit <sup>int</sup> , FLT3 <sup>+</sup> , IL7 <sup>+</sup> | Lin [1]                                                          |
| Common Myeloid Progenitors (CMP)  | Bone Marrow                                                  | Lin <sup>-</sup> , Sca1 <sup>neg</sup> , c-Kit <sup>hi</sup>                                         | Lin [1]                                                          |
| proB cells                        | Bone Marrow                                                  | B220 <sup>+</sup> cKit <sup>+</sup>                                                                  |                                                                  |
| preB cells                        | Bone Marrow                                                  | B220 <sup>+</sup> CD25 <sup>+</sup> IgM <sup>-</sup>                                                 |                                                                  |
| Immature B cells                  | Bone Marrow                                                  | B220 <sup>int</sup> IgM <sup>+</sup> IgD <sup>-</sup>                                                |                                                                  |
| Recirculating B cells             | Bone Marrow                                                  | B220 <sup>+</sup> IgM <sup>hi</sup> IgD <sup>low/-</sup>                                             |                                                                  |
| NK cells                          | Bone Marrow<br>Spleen                                        | DX5 <sup>+</sup> , TcrB <sup>-</sup>                                                                 |                                                                  |
| Immature B cells                  | Spleen                                                       | B220 <sup>int</sup> IgM <sup>+</sup> IgD <sup>med</sup>                                              |                                                                  |
| Transitional B cells              | Spleen                                                       | B220 <sup>+</sup> IgM <sup>hi</sup> IgD <sup>hi</sup>                                                |                                                                  |
| Mature B cells                    | Spleen<br>Lymph Nodes                                        | B220 <sup>+</sup> IgM <sup>lo</sup> IgD <sup>hi</sup>                                                |                                                                  |
| Marginal Zone B cells             | Spleen                                                       | B220 <sup>+</sup> CD21 <sup>hi</sup> CD23 <sup>lo</sup>                                              |                                                                  |
| Follicular B cells                | Spleen<br>Lymph Nodes                                        | B220 <sup>+</sup> CD21 <sup>int</sup> CD23 <sup>hi</sup>                                             |                                                                  |
| Germinal Center B cells           | Spleen<br>Lymph Nodes                                        | B220 <sup>+</sup> FAS <sup>hi</sup> PNA <sup>hi</sup>                                                | Additionally if needed, IgG1 <sup>+</sup> or IgG3 <sup>+</sup>   |
| Double negative thymocytes        | Thymus                                                       | Lin <sup>-</sup>                                                                                     | Lin [2]:<br>CD4, CD8a, Mac1, Gr1, B220, Ter119                   |
| Double negative DN1 thymocytes    | Thymus                                                       | CD44 <sup>+</sup> CD25 <sup>-</sup> c-Kit <sup>+</sup> Lin <sup>-</sup>                              | Lin [2]<br>Además son CD3ε <sup>-</sup>                          |
| Double negative DN2 thymocytes    | Thymus                                                       | CD44 <sup>+</sup> CD25 <sup>+</sup> c-Kit <sup>+</sup> Lin <sup>-</sup>                              | Lin [2]<br>Además son CD3ε <sup>-</sup>                          |
| Double negative DN3 thymocytes    | Thymus                                                       | CD44 <sup>-</sup> CD25 <sup>-</sup> c-Kit <sup>-</sup> Lin <sup>-</sup>                              | Lin [2]                                                          |
| Double negative DN4 thymocytes    | Thymus                                                       | CD44 <sup>-</sup> CD25 <sup>-</sup> c-Kit <sup>-</sup> Lin <sup>-</sup>                              | Lin [2]                                                          |
| Double positive DP thymocytes     | Thymus                                                       | CD4 <sup>+</sup> CD8 <sup>+</sup>                                                                    | Also TCRβ <sup>+</sup><br>CD3ε <sup>+</sup><br>DX5α <sup>-</sup> |
| T lymphocytes CD8-SP              | Thymus [Médula]<br>Spleen<br>Lymph Nodes<br>Peripheral Blood | CD4 <sup>-</sup> CD8 <sup>+</sup>                                                                    | Also TCRβ <sup>+</sup><br>CD3ε <sup>+</sup><br>DX5α <sup>-</sup> |



|                        |                                                     |                                           |                                                                  |
|------------------------|-----------------------------------------------------|-------------------------------------------|------------------------------------------------------------------|
| T lymphocytes CD4-SP   | Thymus<br>Spleen<br>Lymph Nodes<br>Peripheral Blood | CD4 <sup>+</sup> CD8 <sup>-</sup>         | Also TCRβ <sup>+</sup><br>CD3ε <sup>+</sup><br>DX5α <sup>-</sup> |
| Granulocytes           | Bone Marrow<br>Spleen                               | Gr1 <sup>hi</sup> Mac <sup>hi</sup>       |                                                                  |
| Monocytes/ macrophages | Bone Marrow<br>Spleen                               | Gr1 <sup>low/int</sup> Mac1 <sup>hi</sup> |                                                                  |

**Sheep Red Blood Cell (SRBC) immunizations.** Mice were immunized with 200 µl/mouse of SRBCs (Oxoid SR0051C) resuspended in 1X PBS at a concentration of 10<sup>9</sup> cells/ml, by intraperitoneal injection. SRBCs were washed on 1X PBS at least 3 times before counting them used a handheld automated cell counter, Scepter™ [Millipore®, 40µm tips].

**Mouse Embryo Fibroblasts (MEFs) preparation and culture.** MEFs were prepared and isolated as previously described (Bermejo-Rodriguez et al., 2006). Each MEF preparation was genotyped by PCR at the moment of obtention (considered passage 1, P1) and the genotype was confirmed at passage 2, when some cells were frozen down. Cells were counted using a handheld automated cell counter, Scepter™ [Millipore®, 60µm tips]. Cell growth curve was measured while keeping the cells at exponential growth and at an under-confluence state. DNA damage response assays were performed by exposing the cells to gamma irradiation at P2 passage.

**GC B cells stranded mRNA library preparation and sequencing.** MACS-sorted CD43<sup>-</sup> splenic B cells were LPS-stimulated for 72h. Cells were not sorted for B cell subpopulations; WT cell samples contained 1.3-fold more follicular B cells than *Whsc1*<sup>-/-</sup> cells (mean WT FO B cells: 62.07%, SD: 9.61; mean *Whsc1*<sup>-/-</sup> FO B cells: 46.05%, SD: 9.67; total of n=7 WT vs. n=6 *Whsc1*<sup>-/-</sup> independent biological replicates were studied). The libraries from the mouse total RNA were prepared using the TruSeq®Stranded mRNA LT Sample Prep Kit (Illumina Inc., Rev.E, October 2013) according to manufacturer's protocol. Briefly, 0.5 µg of total RNA was used for poly-A based mRNA enrichment with oligo-dT magnetic beads. The mRNA was fragmented (resulting RNA fragment size was 80-250nt, with the major peak at 130nt). The second strand cDNA synthesis was performed in the presence of dUTP instead of dTTP, this allowed to achieve the strand specificity. The blunt-ended double stranded cDNA was 3'adenylated and Illumina indexed adapters were ligated. The ligation product was enriched with 15 PCR cycles and the final library was validated on an Agilent 2100 Bioanalyzer with the DNA 7500 assay. The libraries were sequenced on HiSeq2000 (Illumina, Inc) in paired-end mode with a read length of 2x76bp using TruSeq SBS Kit v3-HS. We generated about 50-70 million paired-end reads for each sample in a fraction of a sequencing flowcell lane, following the manufacturer's protocol. Image analysis, base calling and quality scoring of the run were processed using the manufacturer's software Real Time Analysis (RTA 1.13.48) and followed by generation of FASTQ sequence files by CASAVA. Data reported in the manuscript are tabulated in the Supplemental information Tables 1-3 and are available at GEO (GSE84878).

#### **Sorted proB cells mRNA library preparation and sequencing (low input RNA-seq)**

RNA sequencing libraries were prepared following the SMARTseq2 protocol (Picelli et al., 2013) with minor modifications. Briefly, RNA was quantified using the Qubit RNA HS Assay Kit (Thermo Fisher Scientific) and 3.2-30.6 ng of RNA was used for cDNA synthesis. Reverse transcription was performed using SuperScript II (Invitrogen) in the presence of oligo-dT<sub>30</sub>VN (1µM; 5'-AAGCAGTGGTATCAACGCAGAGTACT<sub>30</sub>VN-3'), template-switching oligonucleotides (1µM) and betaine (1M). The cDNA was amplified using the KAPA Hifi Hotstart ReadyMix (Kappa Biosystems), 100 nM ISPCR primer (5'-AAGCAGTGGTATCAACGCAGAGT-3') and 20 cycles of amplification. Following purification with Agencourt Ampure XP beads (1:1 ratio; Beckmann Coulter), product size distribution and quantity were assessed on a Bioanalyzer using a High Sensitivity DNA Kit (Agilent). 200 ng of the amplified cDNA was fragmented for 10 min at 55 °C using Nextera® XT (Illumina) and amplified for 12 cycles with indexed Nextera® PCR primers. Products were purified twice with Agencourt Ampure XP beads (0.8:1 ratio) and quantified again on a Bioanalyzer using a High Sensitivity DNA Kit. Sequencing of Nextera® libraries was carried out using fraction of a sequencing lane on a HiSeq2000 (Illumina inc.) using TruSeq SBS Kit v3-HS, and between 74-80 million paired-end reads

were generated for each sample. The read length was 101bp with TruSeq Dual Index of 8bp+8bp. Images analysis, base calling and quality scoring of the run were processed using the manufacturer's software Real Time Analysis (RTA 1.13.48) and followed by generation of FASTQ sequence files by CASAVA 1.8. are reported in the manuscript are tabulated in the Supplemental information Tables 4-6 and are available at GEO (GSE88970)

**Bioinformatic analyses.** *Alignment and quantification.* RNA-seq reads were aligned to the mouse reference genome (GRCm38) using STAR (version 2.5.1b)(Dobin et al., 2013) with default ENCODE parameters. For female samples the Y chromosome was removed from the reference before the mapping. Genes were quantified using RSEM (version 1.2.28)(Li and Dewey, 2011) with default parameters. Mouse gene annotation file was downloaded from gencode release vM9 (<http://www.gencodegenes.org/>). *Differential gene expression.* RSEM gene counts was used as input for the DESeq2 R package (version 1.10.1)(Love et al., 2014) for WT vs KO comparison adding sex as a covariate in the model. DESeq2 was run with default parameters. Genes with FDR<5% were considered significant.

*Enrichment Analyses.* Gene ontology for biological processes and KEGG pathway enrichment analysis were performed with DAVID db (Huang da et al., 2009). Gene Set Enrichment Analysis was performed with GSEA (Broad Institute) (Subramanian et al., 2005) using the data obtained after normalization and quantification. The use of non-preranked data allows the obtention of heatmaps for the different genesets employed. Preranked analysis was also performed and it corroborated the results obtained (data not shown). For simplicity, only three WT and three *Whsc1*<sup>-/-</sup> RNA-sequenced samples were used in the GSEA analysis of GC B cells. Normalized Enrichment Scores (NES) and corrected False Discovery Rates (FDR) values are indicated in each plot.

## SUPPLEMENTAL REFERENCES

- Bermejo-Rodriguez, C., Perez-Caro, M., Perez-Mancera, P.A., Sanchez-Beato, M., Piris, M.A., and Sanchez-Garcia, I. (2006). Mouse cDNA microarray analysis uncovers Slug targets in mouse embryonic fibroblasts. *Genomics* 87, 113-118.
- Dobin, A., Davis, C.A., Schlesinger, F., Drenkow, J., Zaleski, C., Jha, S., Batut, P., Chaisson, M., and Gingeras, T.R. (2013). STAR: ultrafast universal RNA-seq aligner. *Bioinformatics* 29, 15-21.
- Huang da, W., Sherman, B.T., and Lempicki, R.A. (2009). Systematic and integrative analysis of large gene lists using DAVID bioinformatics resources. *Nat Protoc* 4, 44-57.
- Li, B., and Dewey, C.N. (2011). RSEM: accurate transcript quantification from RNA-Seq data with or without a reference genome. *BMC Bioinformatics* 12, 323.
- Love, M.I., Huber, W., and Anders, S. (2014). Moderated estimation of fold change and dispersion for RNA-seq data with DESeq2. *Genome Biol* 15, 550.
- Picelli, S., Bjorklund, A.K., Faridani, O.R., Sagasser, S., Winberg, G., and Sandberg, R. (2013). Smart-seq2 for sensitive full-length transcriptome profiling in single cells. *Nat Methods* 10, 1096-1098.
- Subramanian, A., Tamayo, P., Mootha, V.K., Mukherjee, S., Ebert, B.L., Gillette, M.A., Paulovich, A., Pomeroy, S.L., Golub, T.R., Lander, E.S., et al. (2005). Gene set enrichment analysis: a knowledge-based approach for interpreting genome-wide expression profiles. *Proc Natl Acad Sci U S A* 102, 15545-15550.
